# 1 **Mating strategy is determinant of Adenovirus prevalence in European bats**

2 Federica Rossetto<sup>1\*</sup>, Maria Iglesias-Caballero<sup>2</sup>, H. Christoph Liedtke<sup>1</sup>, Ivan Gomez-Mestre<sup>1</sup>, Jose  
3 M. Berciano<sup>2</sup>, Gonzalo Pérez-Suárez<sup>3</sup>, Oscar de Paz<sup>3</sup>, Juan E. Echevarría<sup>2,4</sup>, Inmaculada Casas<sup>2</sup>,  
4 Javier Juste<sup>1,4</sup>.

<sup>1</sup> Evolutionary Biology Unit, Estación Biológica Doñana (CSIC), Sevilla, Spain.

<sup>2</sup> National Center of Microbiology, (ISCIII), Madrid, Spain

<sup>3</sup> Department of Life Sciences, University of Alcalá, Alcalá de Henares, Madrid, Spain.

<sup>4</sup> CIBER Epidemiology and Public Health (CIBERESP), Spain.

\*Corresponding author

E-mail: [federica.rossetto1991@gmail.com](mailto:federica.rossetto1991@gmail.com) (FR)

## 6 **Abstract**

7           Adenoviruses are double-strained DNA viruses found in a great number of vertebrates,  
8 including humans. In order to understand their transmission dynamics, it is crucial, even from a  
9 human health perspective, to investigate how host traits influence their prevalence. Bats are  
10 important reservoirs for Adenoviruses, and here we use the results of recent screenings in  
11 Western Europe to evaluate the association between characteristic traits of bat species and their  
12 probability of hosting Adenoviruses, taking into account their phylogenetic relationships. Across  
13 species, we found an important phylogenetic component in the presence of Adenoviruses and  
14 mating strategy as the most determinant factor conditioning the prevalence of Adenoviruses  
15 across bat species. Contrary to other more stable mating strategies (e.g. harems), swarming could  
16 hinder transmission of Adenoviruses since this strategy implies that contacts between individuals  
17 are too short. Alternatively, bat species with more promiscuous behavior may develop a stronger  
18 immune system. Outstandingly high prevalence of Adenoviruses was reported for the Iberian  
19 species *Pipistrellus pygmaeus*, *P. kuhlii* and *Nyctalus lasiopterus* and we found that in the latter,  
20 males were more likely to be infected by Adenoviruses than females, due to the  
21 immunosuppressing consequence of testosterone during the mating season. As a general trend  
22 across species, we found that the number of Adenoviruses positive individuals was different  
23 across localities and that the difference in prevalence between populations was correlated with  
24 their geographic distances (*P. pygmaeus*). These results increase our knowledge about the  
25 transmission mechanisms of Adenoviruses.

26

27

28

## 29 **Author Summary**

30           Adenoviruses are DNA viruses with a wide range of vertebrate hosts, including humans,  
31 causing ocular, respiratory and gastrointestinal diseases. Here, we focus on the prevalence of  
32 Adenoviruses in bats, which are known to be natural reservoir of many viruses, using the results  
33 of recent screenings for prevalence of these viruses in 33 European bat species. Our aim is to  
34 find association between Adenoviruses prevalence and biological and behavioral host traits,  
35 considering the heterogeneity both between and within species in order to have a deeper  
36 understanding of mechanisms of viral transmission.  
37 Our results highlight the importance of mating strategy: bats species using swarming as mating  
38 strategy are less likely to be infected by Adenoviruses. Moreover, we found that locality of  
39 capture can explain a higher prevalence of Adenovirus within species. However, no general  
40 pattern has been found in the analysis at individual level, suggesting a strong species specificity  
41 and complex viral transmission dynamics.

42

## 43 **Introduction**

44           Some viruses have the potential for cross-species transmission, with spillover episodes  
45 from humans to wildlife and vice versa, a phenomenon referred to as zoonosis [1]. Current  
46 research on the dynamics behind host/virus interactions and inter- and intra-specific  
47 transmissions is of scientific interest and important implications for emerging zoonoses and  
48 consequently for public health.

49           The heterogeneity (understood as the inter- and intra-specific variation) in the ability of  
50 hosts to transmit pathogens is among the most fundamental concepts in disease dynamics and  
51 crucial in the design of disease control strategies [2]. The potentiality of cross-species or cross-  
52 populations transmission depends on the characteristics of host and virus traits and is affected

53 directly or indirectly by a variety of ecological, social, or socioeconomic changes [3] that can  
54 lead to new conditions boosting the expansion of the viruses to new host species or populations.  
55 Recent studies have revealed that traits such as host phylogenetic relatedness, conservation  
56 status, and geographical overlap are critical in the potential for cross-species transmission of  
57 viruses [4,5].

58         The highest proportion of zoonotic viruses in mammals is found in bats, primates and  
59 rodents [6]. Specific bat characteristics like their ability to fly, unique among mammals, or their  
60 migratory capacity [7], increase their potential role as vectors of diseases. Bats are natural  
61 reservoirs for many viruses, such as Coronavirus, Nipah virus and Ebola related to new emerging  
62 diseases that have received attention in the last years due to the potential risk they pose for  
63 human pandemic events [8–10] or with important health and economic consequences world-  
64 wide, such as rabies outbreaks [11,12]. The capacity to coexist with viruses (in the absence of  
65 disease) is probably linked to the bats' immune-system which seems be different to that of other  
66 mammals, [7,13] and related to the development of altered mitochondrial genomes [14]. This  
67 pathogen control in bat hosts has favored ancient events of coevolution or parallel evolution  
68 [15,16] between bats and viruses.

69         Additionally, bats are systematically very diverse and form the second largest order of  
70 mammals [17]. In fact, bats occupy all kinds of habitats throughout all continents except  
71 Antarctica, showing a surprising ecological breadth that implies large variation in trait  
72 characteristics either in their morphology: e.g. size variation across species [18]; social behavior:  
73 e.g. differences in mating system [19]; or habitat requirements: e.g. roosts preferences from trees  
74 to caves [18]. For all these reasons, bats provide a good model to inspect the correlation of host  
75 trait characteristics with the prevalence of viruses.

76         Adenoviruses (AdVs) are non-enveloped dsDNA viruses with a broad range of vertebrate  
77 hosts, including humans. These viruses have been grouped into five genera [20]: *Mastadenovirus*

78 (mammals), *Atadenovirus* (mammals, birds and reptiles), *Aviadenovirus* (birds), *Siadenovirus*  
79 (poultry and amphibians) and *Ichtadenovirus* (fish). Symptoms in humans include respiratory,  
80 eye infections and intestinal or digestive illness and seldom lead to mortality [21,22]. Since the  
81 first detection of an AdV in a fruit bat from Japan [23], a high diversity of AdVs has been  
82 isolated from bats from America, Africa and Asia, all grouped within the genus *Mastadenovirus*  
83 [24]. The first AdV in a European bat was isolated from a common pipistrelle (*Pipistrellus*  
84 *pipistrellus*) in Germany [25]. Later, Vidovszky *et al.* [26] obtained partial sequences from as  
85 many as 28 presumably new AdVs hosted by 12 different bat species in Germany and Hungary.  
86 Iglesias-Caballero *et al.* [16] conducted a country-wide survey in Spain constituting the largest  
87 screening for AdVs in bats to date, checking >1,000 individuals belonging to 28 species and  
88 focusing not only on the analysis of fecal samples and internal tissues -as in previous studies-  
89 but also on the analysis of the oropharyngeal swabs. AdVs are detected in almost half of the  
90 Iberian bat species studied, in both feces and in the upper respiratory tract (for the first time in  
91 bats), establishing a possible fecal-oral transmission route in two *Pipistrellus pygmaeus*.  
92 Moreover, they found a surprisingly high prevalence in this species together with the co-generic  
93 *P. kuhlii* and the closely related giant noctule, *Nyctalus lasiopterus*, which accounted for the vast  
94 majority of viruses detected in the study. These results have presented us with the opportunity to  
95 analyze the abiotic factors or biotic traits determining prevalence of AdVs in European bats at  
96 two levels: across-species and among individuals within a species.

97         The analysis of morphological and behavioral traits and presence of AdVs in bats is also  
98 useful for the understanding of viral transmission dynamics. In fact, little is known about the  
99 transmission mechanisms of AdVs and no study has focused on transmission in bats. A handful  
100 of studies in humans suggest that transmission may need direct contact or at least a droplet  
101 spraying (such as those produced by coughing or sneezing) or aerosol [27–29]. The strong host  
102 specificity and the parallelism between host and AdVs phylogenies found for bats [16,30] and

103 for primates [31] strongly suggest that cross-species switching of mastadenovirus are not  
104 frequent events although they have been detected in AdVs evolution [30].

105 No study has focused so far on the analyses of the determinant factors influencing  
106 prevalence of viruses on bats at both species and individual levels. Across species, Webber *et al.*  
107 [32] found that viral richness was positively correlated with group size as predicted by the  
108 contact-rate hypothesis. In turn, at the intra-specific level Dietrich *et al.* [33] found an important  
109 seasonal shift in prevalence with a significant increase in AdVs shedding during reproduction  
110 while studying AdVs prevalence in two bats (*Miniopterus natalensis* and *Rousettus aegyptiacus*).  
111 The aim of this study is to advance our understanding of heterogeneity in the prevalence of  
112 AdVs in bats, testing the association between traits and presence of AdVs at both the among-  
113 species and within-species levels. Among species, and according to the contact-rate hypothesis,  
114 higher prevalence of AdVs is expected in species roosting in large groups, sharing refuge with  
115 other species and/or mating in swarming aggregations. In addition, we hypothesize a strong  
116 phylogenetic signal given the strong species-specificity found in the presence of AdVs. Within  
117 species, we predict a higher prevalence in females because of their concentration in large  
118 numbers in nursery colonies [34], with high contact rate and a high concomitant risk of infection.

119 In summary, our aims were to: 1) Test for significant phylogenetic component to the  
120 presence of AdVs in European bats; 2) test the importance of ecological characteristics at a  
121 species-level for the presence of AdVs taking into account phylogenetic relationships; 3)  
122 investigate whether some individual characteristics are determinant to explain the differences in  
123 the prevalence of AdVs within species.

124

## 125 **Results**

126 The final working database consisted of 1,985 bats sampled and checked for AdVs,  
127 belonging to 10 genera (*Barbastella*, *Eptesicus*, *Hypsugo*, *Miniopterus*, *Myotis*, *Nyctalus*,

128 *Pipistrellus*, *Plecotus*, *Rhinolophus*, *Vespertilio*) and representing 33 of the 45 European bat  
 129 species. This database included a total of 1,612 bats belonging to 27 Iberian species surveyed for  
 130 the study (Fig 1). The inclusion in the analyses of the published results from Vidovszky *et al.*  
 131 [26] and Sonntag *et al.* [25] for Germany and Hungary, allowed the addition of seven European  
 132 species (*Eptesicus nilssonii*, *Myotis brandtii*, *M. dasycneme*, *M. nattereri*, *Pipistrellus nathusii*  
 133 and *Vespertilio murinus*), not included in the Iberian database.

134

135 **Table 1: Number of individuals screened as positive or negative for Adenoviruses and**  
 136 **percentage of positives for each species taken into account in this study.**

| Species                          | N° Positives | N° Negatives | Percentage (%) | Lower limit (%) | Upper limit (%) |
|----------------------------------|--------------|--------------|----------------|-----------------|-----------------|
| <i>Barbastella barbastellus</i>  | 0            | 46           | 0.00           |                 |                 |
| <i>Eptesicus nilssonii</i>       | 1            | 5            | 16.67          | 0.85            | 58.18           |
| <i>Eptesicus isabellinus</i>     | 4            | 18           | 18.18          | 6.46            | 36.91           |
| <i>Eptesicus serotinus</i>       | 2            | 20           | 9.09           | 1.64            | 25.95           |
| <i>Hypsugo savii</i>             | 3            | 50           | 5.66           | 1.56            | 13.98           |
| <i>Miniopterus schreibersii</i>  | 0            | 163          | 0.00           |                 |                 |
| <i>Myotis alcathoe</i>           | 0            | 4            | 0.00           |                 |                 |
| <i>Myotis bechsteinii</i>        | 1            | 38           | 2.56           | 0.13            | 11.60           |
| <i>Myotis blythii</i>            | 1            | 35           | 2.78           | 0.14            | 12.51           |
| <i>Myotis brandtii</i>           | 0            | 7            | 0.00           |                 |                 |
| <i>Myotis capaccinii</i>         | 0            | 15           | 0.00           |                 |                 |
| <i>Myotis crypticus</i>          | 0            | 3            | 0.00           |                 |                 |
| <i>Myotis dasycneme</i>          | 2            | 3            | 40.00          | 7.64            | 81.07           |
| <i>Myotis daubentonii</i>        | 0            | 102          | 0.00           |                 |                 |
| <i>Myotis emarginatus</i>        | 4            | 59           | 6.35           | 2.20            | 13.94           |
| <i>Myotis escaleraei</i>         | 0            | 23           | 0.00           |                 |                 |
| <i>Myotis myotis</i>             | 5            | 88           | 5.38           | 2.14            | 10.97           |
| <i>Myotis mystacinus</i>         | 1            | 29           | 3.33           | 0.17            | 14.86           |
| <i>Myotis nattereri</i>          | 0            | 13           | 0.00           |                 |                 |
| <i>Nyctalus lasiopterus</i>      | 24           | 210          | 10.26          | 7.17            | 14.12           |
| <i>Nyctalus leisleri</i>         | 5            | 40           | 11.11          | 4.48            | 21.95           |
| <i>Nyctalus noctula</i>          | 24           | 60           | 28.57          | 20.55           | 37.77           |
| <i>Pipistrellus kuhlii</i>       | 22           | 208          | 9.57           | 6.56            | 13.38           |
| <i>Pipistrellus nathusii</i>     | 2            | 13           | 13.33          | 2.42            | 36.34           |
| <i>Pipistrellus pipistrellus</i> | 10           | 85           | 10.53          | 5.82            | 17.20           |
| <i>Pipistrellus pygmaeus</i>     | 30           | 268          | 10.07          | 7.34            | 13.41           |
| <i>Plecotus auritus</i>          | 1            | 26           | 3.70           | 0.19            | 16.40           |
| <i>Plecotus austriacus</i>       | 0            | 15           | 0.00           |                 |                 |

|                                  |   |    |       |      |       |
|----------------------------------|---|----|-------|------|-------|
| <i>Rhinolophus euryale</i>       | 7 | 40 | 14.89 | 7.20 | 26.16 |
| <i>Rhinolophus ferrumequinum</i> | 9 | 95 | 8.65  | 4.59 | 14.62 |
| <i>Rhinolophus hipposideros</i>  | 1 | 10 | 9.09  | 0.47 | 36.44 |
| <i>Rhinolophus mehelyi</i>       | 0 | 1  | 0.00  |      |       |
| <i>Vespertilio murinus</i>       | 1 | 14 | 6.67  | 0.34 | 27.94 |

137

138 Data from Vidovszky *et al.* [26] and Sonntag *et al.* [25] included. Lower and upper limits of  
139 95% confidence intervals of the percentage have been included.

140

141 The number of individuals sampled within species varied considerably and 5 species  
142 (*Myotis daubentonii*, *Miniopterus schreibersii*, *Nyctalus lasiopterus*, *Pipistrellus kuhlii*, *P.*  
143 *pygmaeus*), accounted for 50% of the total number of individuals sampled for this study. On the  
144 other hand, the species *Eptesicus nilssonii*, *Myotis alcathoe*, *M. brandtii*, *M. crypticus*,  
145 *Rhinolophus mehelyi* were represented by fewer than 10 individuals and were consequently  
146 discarded from the proportion-based analyses of prevalence. Values of proportion of positive  
147 samples varied considerably across species, averaging 7.02% (Table 1). The species targeted for  
148 the individual-level analyses were: *Nyctalus lasiopterus* (10.26% prevalence), *Pipistrellus*  
149 *pygmaeus* (10.07% prevalence) and *Pipistrellus kuhlii* (9.57% prevalence).

150

## 151 **Phylogenetic Signal**

152 The fully resolved phylogeny for all the studied species with proportional branch lengths  
153 was used to estimate the different phylogenetic component in AdVs presence (S1 Fig). Fritz's *D*  
154 parameter was 0.482, and we detected a marginally significant departure from Brownian motion  
155 structure ( $p = 0.058$ ), whereas the probability of *D* resulting from Brownian motion structure was  
156  $p = 0.165$ . The value of Pagel's  $\lambda$  when analyzing the distribution of proportion of AdVs across  
157 the phylogeny was  $\lambda = 0.99$  and highly significant ( $p = 0.0003$ ) and Blomberg' *K* was  $K = 0.74$  ( $p$



158 =0.002). Thus, the distribution of the AdVs infection across the studied European bats showed a  
159 strong phylogenetic component following Brownian motion.

### 160 **Trait association with AdVs prevalence**

161 The phylogenetic linear regression analysis showed that regardless of the phylogenetic  
162 model used (although Brownian motion had the lowest AIC score, all three models tested were  
163 within  $\Delta\text{AIC} \leq 3$ ), the variable MATING STRATEGY showed a significant (and negative) effect  
164 , as shown in Fig 2 (model=Brownian motion,  $t = -2.8920$ ,  $p = 0.0093$ ; all model results  
165 presented in S1 Table). Moreover, the same result was recovered when using AdVs presence as a  
166 binomial dependent variable (S2 Table), indicating a significantly higher AdVs presence in bat  
167 species not engaging in swarming for mating.

168 At individual level and for the three species considered, the complete models were used  
169 since no model was selected by AIC ( $\Delta\text{AIC} < 3$ ). The GLMM analysis revealed a significantly  
170 higher AdVs presence for males ( $z = 2.067$ ,  $p = 0.039$ ) in *N. lasiopterus* (Fig 3A), and a trend  
171 towards higher AdVs prevalence for individuals with smaller forearm (Fig 3B) for *P. kuhlii* ( $z = -$   
172  $1.656$ ,  $p = 0.098$ ). The variance of the model explained by only the random variable was 4% for  
173 *N. lasiopterus*, 62% for *P. pygmaeus* and 16% for *P. kuhlii*. Results for all the variables selected  
174 are available in supplementary material S3 Table.

### 175 **Mantel test**

176 The Mantel tests showed no significant correlation for all pairwise comparisons between  
177 geographic distances and differences in the proportion of AdVs presence across localities for *N.*  
178 *lasiopterus* ( $r = -0.3186$ ;  $p = 0.941$ ) and *P. kuhlii* ( $r = 0.1132$ ;  $p = 0.113$ ) (S2 Fig), but this  
179 correlation was significant for *P. pygmaeus* ( $r = 0.3364$ ;  $p = 0.036$ ) indicating that with greater  
180 distance, there will be a greater difference in the proportion of individuals affected by AdVs (S2  
181 Fig).

182

## 183 Discussion

184 For the first time to our knowledge, Adenovirus prevalence and its correlation with host  
185 traits is studied across a wide range of bats both at the species and individual level. The  
186 understanding of which and how host traits affect the presence of viruses in bats is a key step to  
187 the understanding of the transmission mechanisms and evolutionary strategies of viruses. Such  
188 mechanisms are key in the process of host switching that cause the appearance of emerging  
189 diseases and therefore its understanding is important to improve disease managements [35]. Our  
190 results show that Adenoviruses seem to be quite common in European bats since they were  
191 found across all the studied tribes and in most genera (except for *Barbastella* and *Miniopterus*)  
192 but their prevalence varied considerably among species [16]. The three most abundant species  
193 showing the highest frequency of adenovirus infection (*Nyctalus lasiopterus*, *Pipistrellus*  
194 *pygmaeus* and *P. kuhlii*) experienced an average of 9.97% prevalence. In contrast, other species  
195 showed very low Adenovirus presence and was completely absent in others despite their large  
196 sample sizes (e.g.: *Miniopterus schreibersii*) but in other species, the absence of positive results  
197 could be due to the low number of sampled individuals (generally the rarest bats in Europe).

198 Fritz's  $D$ , Pagel's  $\lambda$  and Blomberg's  $K$  parameters all pointed to a strong phylogenetic  
199 signal in the presence of AdVs across European bats and consequently, the need for accounting  
200 for phylogenetic relationships in all subsequent models. This phylogenetic component of the  
201 distribution pattern of AdVs in bats was also recently suggested by Iglesias-Caballero *et al.* [16]  
202 as the sequences of new mastadenoviruses were clustering generally in agreement with the host  
203 bat families or even with the bat species.

204 Contrary to a previous study on the factors influencing viruses on bats [32], we have not  
205 found significant effect of the bats' group size on the presence of Adenoviruses for European  
206 species. In their study, Webber *et al.* [32] had a wider perspective and focused on overall viral  
207 richness in bats, whereas this study is centered exclusively on AdVs and so our differing results

208 may indicate that Adenoviruses use different transmission pathways than other viruses.  
209 Transmission of respiratory AdVs in humans requires close contact although it can possibly  
210 occur through droplet spray (such as those produced by coughing or sneezing) and/or aerosols,  
211 but data are still limited [27–29]. In general, little is known about transmission mechanisms of  
212 Adenoviruses and to our knowledge, no study has focused on this particular aspect across bats,  
213 although the host species specificity found for most of the Adenoviruses in bats [16] points to  
214 cross-species contacts as rare events.

215         Counterintuitively, species engaging in swarming behavior were found to have  
216 significantly lower prevalence of Adenoviruses than other bats despite having theoretically  
217 greater chances of contact. Swarming related to mating is shown mainly by forest species and is  
218 described as the gathering of bats, commonly in caves and underground sites, during a few hours  
219 after dusk and for a few days [36]. Two hypotheses could explain this finding. Firstly, bat  
220 species engaging in swarming seem to be in contact for only a short time, which would imply a  
221 lower chance of transmission compared to bats with polygynous mating systems, like harems,  
222 which stay in contact for longer periods of time, sometimes all year around [37]. A second  
223 plausible hypothesis is based on the fact that mammals with high infection risk, especially those  
224 with promiscuous behavior, develop a stronger immune system compared to species with low  
225 infection risk [38,39]. Thus, it seems reasonable that bats with swarming behavior may show  
226 stronger immune response protecting them from infections, despite being very costly and even  
227 represent a trade-off with other life-history traits [39].

228         When analyzing the effect on the AdVs presence of within-species variance in traits, we  
229 found that the site of capture explains an important part of the variance of all models suggesting  
230 an underlying general pattern across species and supporting the contact-rate hypothesis. This  
231 trend is particularly clear for *Pipistrellus pygmaeus*, whose sampling localities are more  
232 widespread along the Iberian Peninsula than those for *Nyctalus lasiopterus* and *P. kuhlii* (Fig 4).

233 Following the contact-rate hypothesis, bats from a specific locality interact with other individuals  
234 of the same area, favoring the virus transmission locally [7]. A similar pattern was already found  
235 for the viruses responsible for avian influenza, Marburg or Ebola [40–42]. In this direction, the  
236 Mantel’s test supported a significant geographic component in the incidence of the Adenoviruses  
237 for *Pipistrellus pygmaeus* which is typically sedentary species [34].

238 A higher prevalence of Adenoviruses was found in males for *Nyctalus lasiopterus*, the  
239 species in which the different sexes were best represented. This result is particularly interesting  
240 since it could affect the general dynamics of the virus given the generally predominant role  
241 played by males in dispersal [43]. The possibility of a sex byes infection as a general pattern  
242 should be explored further in other bat species and could be related to the trade-off between  
243 immune function and reproduction, making males more susceptible to virus infections during  
244 reproductive season due to the immune-suppressant effect of testosterone production [44].

245 Our results show that, individuals with smaller forearm are more likely to be infected by  
246 Adenoviruses for *Pipistrellus kuhlii*. Subadult bats usually have slightly longer forearms [34] and  
247 the lower prevalence in bats with larger measures could be explained by the influence of the  
248 antibody loads transferred to them through their mother’s milk in still developing bats, making  
249 them less suitable to Adenoviruses prevalence [45]. This is just a possibility and further studies  
250 should help understand the relationships between Adenoviruses presence and age.

251 In sum, our findings highlight a common occurrence of Adenoviruses in European bats  
252 and provide evidence of the importance of mating behavior in the prevalence of Adenoviruses,  
253 contrary to what has been suggested generally for viruses. Besides, the three European bats  
254 species that had higher Adenovirus prevalence do not show any common pattern, pointing to  
255 Adenoviruses transmission as a complex process. Our study highlights the importance of  
256 combining behavioral with ecological traits in explaining viral richness and transmission.

257

## 258 **Materials and Methods**

### 259 **Ethics Statement**

260 Non-lethal sampling was based on permits 201710730002961/IRM/MDCG/mes issued  
261 by Dirección General de Gestión del Medio Natural y Espacios Protegidos (Consejería de Medio  
262 Ambiente, Junta de Andalucía, Spain), 10/085545.9/17.9/17 issued by Consejería de Medio  
263 Ambiente, Administración Local y Ordenación del Territorio, Comunidad de Madrid, and  
264 PNSNG\_SG\_2018\_0093 issued by Servicio Territorial de Medio Ambiente de Segovia, Junta de  
265 Castilla y León. The techniques used meet the guidelines published by the American Society of  
266 Mammalogists on the use of wild mammals in research [46]

267

### 268 **Data collection**

269 Most of the information used in this study was obtained during a surveillance program for  
270 bat rhabdovirus and lyssavirus carried out between 2004 and 2008, 2016 and 2018. Bats were  
271 mist-netted near roosts or over water and released in the same collecting point after sampling.  
272 Each animal was identified, sexed, measured and weighed. Sampling consisted of obtaining a  
273 membrane wing-punch, saliva with oropharyngeal swabs and stool samples (when this was  
274 possible). Swabs were stored in 1.5 mL tubes filled with lysis buffer. All samples were aliquoted  
275 and stored at -80 °C prior to analysis. Samples were screened for AdVs following published  
276 protocols [16,47,48]. Our own database was completed with the published data of AdVs  
277 presence in bats from Germany and Hungary [25,26]. The identification of bats belonging to  
278 species complexes was confirmed through PCR amplification of a diagnostic mtDNA fragment  
279 following Ibañez *et al.*, [49] and Kaňuch *et al.* [50].

### 280 **Phylogeny and phylogenetic signal**

281 A fully resolved phylogeny containing all the study species was not available from the  
282 literature and is notoriously difficult to reconstruct for this group, [51] and so a hybrid approach  
283 was taken whereby, published trees were grafted to obtain a full-solved topology whereas branch  
284 lengths were estimated using molecular sequence data. The published phylogenetic studies for  
285 the four families existing in Europe, used to manually construct a topology of all species in this  
286 study were Guillén-Servent *et al.*, [52] for relationship in the family Rhinolophidae; Ruedi *et al.*,  
287 [53] and Stadelmann *et al.* [54] for the subfamily Myotinae within Vespertilionidae; and Hofer  
288 and Bussche [55] for the rest of this last family and for the family Miniopteridae. Complete  
289 sequences of the mitochondrial genes *cytochrome b* (*CYTB*) and *NADH dehydrogenase 1* (*ND1*)  
290 were obtained from GenBank for all available European species and were used to estimate  
291 branch length in the constructed topology. This dataset needed to generate sequences *de novo* for  
292 the species *Miniopterus schreibersii* for which these markers were not available. The new  
293 sequences are deposited in GenBank under the accession numbers MK737740 and MK737741.  
294 For each locus sequences were aligned with the software ‘ALTER’ from  
295 <http://darwin.uvigo.es/software/> [56] and MEGA [57], and partitionfinder v2.1.1 [58] was run on  
296 the concatenated alignment (1805 base pairs in length) to obtain the optimal partitioning scheme  
297 and substitution models. Partitionfinder was set to use unlinked branch lengths, search only  
298 BEAST models with the ‘greedy’ algorithm and AICc as the model selection criterion. A  
299 maximum of six possible partitions were allowed; the three codon positions of the two loci.  
300 BEAST v2.4.7 [59] was then fed the alignment and the fixed topology, and using a relaxed clock  
301 log normal model with exponential priors on the mean (mean=10) and standard deviation  
302 (mean=0.33), was allowed to estimate the branch lengths over 20 million MCMC iterations,  
303 storing every 1000th. Chain diagnostics was performed using Tracer v1.7 [60] to ensure  
304 sufficient mixing and parameter convergence and a maximum clade credibility tree was  
305 generated using TreeAnnotator v.2.4.7 (part of BEAST package) using a 10% burn-in and  
306 median node heights.

307 Fritz's  $D$ , Pagel's  $\lambda$  and Blomberg's  $K$  parameters were used to estimate the strength of  
308 the phylogenetic signal affecting the pattern of AdVs presence across European bats. Fritz's  $D$   
309 was used for binary data (presence/absence) so that values close to one indicate that the  
310 distribution of the binary trait is random with respect to the given phylogeny and values close to  
311 zero indicate the trait is distributed as expected under a Brownian motion model of evolution  
312 [61]. When the variable estimated was the proportion of infected bats in each species, Pagel's  $\lambda$   
313 and Blomberg's  $K$  parameters were used. Values of  $\lambda$  range from zero to one where  $\lambda = 0$   
314 indicates that related species do not share similar values for the trait (percentage of infection) and  
315  $\lambda = 1$  indicates a pattern fully explained by the phylogenetic relationships under Brownian  
316 motion, with related species showing similar values for the given trait. Finally,  $K$  is scaled so that  
317 zero indicates no phylogenetic signal,  $K=1$  is the expected value for trait evolution under  
318 Brownian motion and values higher than one suggest stronger phylogenetic signal than predicted  
319 by Brownian motion [62,63].

320

### 321 **Variables Selection and modelling**

322 Ecological and behavioural traits were selected considering their '*a priori*' importance for  
323 the virus transmission and their availability for the European bat species from the bat literature  
324 and general revisions [64], identification guides [34] (S4 Table). For the comparative analysis  
325 across all European bats, the following variables were recorded for each species: (1) GROUP  
326 SIZE, defined as the upper bound of individuals found usually in summer roosts; (2)  
327 FOREARM: defined as the average range of forearm length (in mm) reported for each species;  
328 (3) SOCIABILITY defined as the chance of sharing summer roost with other species and  
329 considering just two categories: species that have never been found sharing their roost with other  
330 species and species that sometimes or always share roost with other species; (4) MATING  
331 STRATEGY: considered as whether mating takes place in seasonal swarming or not; (5)

332 MIGRATION: defined as whether the bat species is known to perform long-distance movements  
333 (longer than 100 km), regional (between 10 and 100 km) or no movements; (6) ROOST TYPE:  
334 considered in three categories: roosts in caves, trees or crevices. At the individual level, the  
335 analyses focused on the three species that showed the highest AdVs presence combined with a  
336 large enough sample size (> 200 individuals). The recorded variables were: (1) LOCALITY: site  
337 of capture; (2) SEX: male or female; (3) FOREARM: Measured in mm.

338 For among-species comparisons, AdVs prevalence was analyzed as the arcsin-  
339 transformed proportion of positive samples over the total number of samples for each species.  
340 Species with fewer than 10 samples were eliminated from the matrix and from the phylogeny.  
341 The analyses were also run considering presence/absence of AdVs as a dependent variable and  
342 including in this case all sampled species. The analyses were performed with R statistical  
343 computing packages [65] and scripts are available upon request. Fritz's D, Pagel's  $\lambda$  and  
344 Blomberg's K parameters were estimated with the packages '*Caper*' [66] and '*Phytools*' [67].  
345 Phylogenetic linear regressions were carried out with the package '*Phyloilm*' [68] that respects  
346 the shared evolutionary histories of species [69]. Models of trait evolution were compared  
347 assuming correlation structures under either Brownian motion, Ornstein-Uhlenbeck or Pagel  
348 models [70] and the best model was selected based on the Akaike Information Criterion (AIC)  
349 [71]. As a threshold value for model selection, a model showing  $\Delta AIC > 3$  was taken as having  
350 greater support [72]. Complementary, a binary phylogenetic generalized linear model was run  
351 for each species, with presence of AdVs as the dependent variable and using the '*Ape*' package  
352 [73].

353 Within species, we used general linear mixed models implemented in the '*Lme4*' package  
354 [74] to test for associations between traits and presence of AdVs, and considering AdVs presence  
355 as a binary dependent variable. In order to account for uncontrolled spatial variation,  
356 LOCALITY was included in the models as a random variable. The best linear mixed model was



357 again selected based on AIC and same threshold criterion. As a confirmatory analysis for the  
358 models, the variance explained by only the fixed variables was compared to the variance  
359 obtained including the random variables using the package ‘*Mumin*’ [75]

360 At both among-species and within-species levels, inter-correlation was were checked  
361 using a Pearson’s correlation test for continuous variables and an ANOVA for categorical  
362 variables. The spatial distribution of the AdVs positive bats was inspected by performing a  
363 Mantel test between the matrix of geographic distances and the matrix of differences in  
364 proportion of infection between sites with the package ‘*Ade4*’ [76,77].

365

## 366 **Acknowledgments**

367

368 We are grateful to the bats team of the Estación Biológica de Doñana (CSIC) and to Francisco  
369 Pozo and collaborators of the Instituto de Salud Pública Carlos III for their collaboration. We  
370 thank Jens Rydell, David Serrano, Josué Martínez de la Puente, Josean Donazar and Carlos  
371 Herrera for their useful suggestions and comments.

372

373

374 **References**

375

- 376 1. Taylor LH, Latham SM, Woolhouse MEJ. Risk factors for human disease emergence.  
377 Woolhouse MEJ, Dye C, editors. *Philosophical Transactions of the Royal Society of*  
378 *London Series B: Biological Sciences*. 2001;356: 983–989. doi:10.1098/rstb.2001.0888
- 379 2. VanderWaal KL, Ezenwa VO. Heterogeneity in pathogen transmission: mechanisms and  
380 methodology. *Functional Ecology*. 2016;30: 1606–1622. doi:10.1111/1365-2435.12645
- 381 3. Morse SS, Mazet JA, Woolhouse M, Parrish CR, Carroll D, Karesh WB, et al. Prediction  
382 and prevention of the next pandemic zoonosis. *The Lancet*. 2012;380: 1956–1965.  
383 doi:10.1016/S0140-6736(12)61684-5
- 384 4. Streicker DG, Turmelle AS, Vonhof MJ, Kuzmin IV, McCracken GF, Rupprecht CE. Host  
385 Phylogeny Constrains Cross-Species Emergence and Establishment of Rabies Virus in  
386 Bats. *Science*. 2010;329: 676–679. doi:10.1126/science.1188836
- 387 5. Luis Angela D., Hayman David T. S., O’Shea Thomas J., Cryan Paul M., Gilbert Amy T.,  
388 Pulliam Juliet R. C., et al. A comparison of bats and rodents as reservoirs of zoonotic  
389 viruses: are bats special? *Proceedings of the Royal Society B: Biological Sciences*.  
390 2013;280: 20122753. doi:10.1098/rspb.2012.2753
- 391 6. Olival KJ, Hosseini PR, Zambrana-Torrel C, Ross N, Bogich TL, Daszak P. Host and  
392 viral traits predict zoonotic spillover from mammals. *Nature*. 2017;546: 646.  
393 doi:10.1038/nature22975
- 394 7. Calisher CH, Childs JE, Field HE, Holmes KV, Schountz T. Bats: Important Reservoir  
395 Hosts of Emerging Viruses. *Clinical Microbiology Reviews*. 2006;19: 531–545.  
396 doi:10.1128/CMR.00017-06

- 397 8. Leroy EM, Kumulungui B, Pourrut X, Rouquet P, Hassanin A, Yaba P, et al. Fruit bats as  
398 reservoirs of Ebola virus. *Nature*. 2005;438: 575. doi:10.1038/438575a
- 399 9. Li W, Shi Z, Yu M, Ren W, Smith C, Epstein JH, et al. Bats Are Natural Reservoirs of  
400 SARS-Like Coronaviruses. *Science*. 2005;310: 676–679. doi:10.1126/science.1118391
- 401 10. Yob JM, Field H, Rashdi AM, Morrissy C, Heide B van der, Rota P, et al. Nipah virus  
402 infection in bats (order Chiroptera) in peninsular Malaysia. *Emerging Infectious Diseases*.  
403 2001;7: 439. doi:10.3201/eid0703.010312
- 404 11. Dobson AP. What Links Bats to Emerging Infectious Diseases? *Science*. 2005;310: 628–  
405 629. doi:10.1126/science.1120872
- 406 12. Mayen F. Haematophagous Bats in Brazil, Their Role in Rabies Transmission, Impact on  
407 Public Health, Livestock Industry and Alternatives to an Indiscriminate Reduction of Bat  
408 Population. *Journal of Veterinary Medicine, Series B*. 2003;50: 469–472.  
409 doi:10.1046/j.1439-0450.2003.00713.x
- 410 13. Baker ML, Schountz T, Wang L-F. Antiviral Immune Responses of Bats: A Review.  
411 *Zoonoses and Public Health*. 2013;60: 104–116. doi:10.1111/j.1863-2378.2012.01528.x
- 412 14. Brook CE, Dobson AP. Bats as ‘special’ reservoirs for emerging zoonotic pathogens.  
413 *Trends in Microbiology*. 2015;23: 172–180. doi:10.1016/j.tim.2014.12.004
- 414 15. Pozo F, Juste J, Vázquez-Morón S, Aznar-López C, Ibáñez C, Garin I, et al. Identification  
415 of Novel Betaherpesviruses in Iberian Bats Reveals Parallel Evolution. *PLOS ONE*.  
416 2016;11: e0169153. doi:10.1371/journal.pone.0169153

- 417 16. Iglesias-Caballero M, Juste J, Vázquez-Morón S, Falcon A, Aznar-Lopez C, Ibáñez C, et al.  
418 New Adenovirus Groups in Western Palaearctic Bats. *Viruses*. 2018;10: 443.  
419 doi:10.3390/v10080443
- 420 17. Simmons NB. Order Chiroptera. *Mammal Species of the World : A Taxonomic and*  
421 *Geographic Reference*. 2005; 312–529.
- 422 18. Kunz TH. Roosting Ecology of Bats. In: Kunz TH, editor. *Ecology of Bats*. Boston, MA:  
423 Springer US; 1982. pp. 1–55. doi:10.1007/978-1-4613-3421-7\_1
- 424 19. Altringham JD. *Bats: From Evolution to Conservation*. OUP Oxford; 2011.
- 425 20. Davison AJ, Benkő M, Harrach B. Genetic content and evolution of adenoviruses. *Journal*  
426 *of General Virology*. 2003;84: 2895–2908. doi:10.1099/vir.0.19497-0
- 427 21. Brandt CD, Kim HW, Vargosko AJ, Jeffries BC, Arrobio JO, Rindge B, et al.  
428 INFECTIONS IN 18, 000 INFANTS AND CHILDREN IN A CONTROLLED STUDY  
429 OF RESPIRATORY TRACT DISEASE. I. ADENOVIRUS PATHOGENICITY IN  
430 RELATION TO SEROLOGIC TYPE AND ILLNESS SYNDROME. *Am J Epidemiol*.  
431 1969;90: 484–500. doi:10.1093/oxfordjournals.aje.a121094
- 432 22. Khanal S, Ghimire P, Dhamoon AS. The Repertoire of Adenovirus in Human Disease: The  
433 Innocuous to the Deadly. *Biomedicines*. 2018;6: 30. doi:10.3390/biomedicines6010030
- 434 23. Maeda K, Hondo E, Terakawa J, Kiso Y, Nakaichi N, Endoh D, et al. Isolation of Novel  
435 Adenovirus from Fruit Bat (*Pteropus dasymallus yayeyamae*). *Emerg Infect Dis*. 2008;14:  
436 347–349. doi:10.3201/eid1402.070932

- 437 24. Li Y, Ge X, Zhang H, Zhou P, Zhu Y, Zhang Y, et al. Host Range, Prevalence, and Genetic  
438 Diversity of Adenoviruses in Bats. *Journal of Virology*. 2010;84: 3889–3897.  
439 doi:10.1128/JVI.02497-09
- 440 25. Sonntag M, Mühldorfer K, Speck S, Wibbelt G, Kurth A. New Adenovirus in Bats,  
441 Germany. *Emerging Infectious Diseases*. 2009;15: 2052. doi:10.3201/eid1512.090646
- 442 26. Vidovszky MZ, Kohl C, Boldogh S, Görföl T, Wibbelt G, Kurth A, et al. Random sampling  
443 of the Central European bat fauna reveals the existence of numerous hitherto unknown  
444 adenoviruses+. *Acta Veterinaria Hungarica*. 2015; doi:10.1556/004.2015.047
- 445 27. Musher DM. How Contagious Are Common Respiratory Tract Infections? *New England*  
446 *Journal of Medicine*. 2003;348: 1256–1266. doi:10.1056/NEJMra021771
- 447 28. Sandrock C, Stollenwerk N. Acute Febrile Respiratory Illness in the ICU. *Chest*. 2008;133:  
448 1221–1231. doi:10.1378/chest.07-0778
- 449 29. Pica N, Bouvier NM. Environmental factors affecting the transmission of respiratory  
450 viruses. *Current Opinion in Virology*. 2012;2: 90–95. doi:10.1016/j.coviro.2011.12.003
- 451 30. Kohl C, Vidovszky MZ, Mühldorfer K, Dabrowski PW, Radonić A, Nitsche A, et al.  
452 Genome Analysis of Bat Adenovirus 2: Indications of Interspecies Transmission. *Journal of*  
453 *Virology*. 2012;86: 1888–1892. doi:10.1128/JVI.05974-11
- 454 31. Podgorski II, Pantó L, Földes K, de Winter I, Jánoska M, Sós E, et al. Adenoviruses of the  
455 most ancient primate lineages support the theory on virus–host co-evolution. *Acta*  
456 *Veterinaria Hungarica*. 2018;66: 474–487. doi:10.1556/004.2018.042

- 457 32. Webber QMR, Fletcher QE, Willis CKR. Viral Richness is Positively Related to Group  
458 Size, but Not Mating System, in Bats. *EcoHealth*. 2017;14: 652–661. doi:10.1007/s10393-  
459 017-1276-3
- 460 33. Dietrich Muriel, Kearney Teresa, Seamark Ernest C. J., Paweska Janusz T., Markotter  
461 Wanda. Synchronized shift of oral, faecal and urinary microbiotas in bats and natural  
462 infection dynamics during seasonal reproduction. *Royal Society Open Science*. 5: 180041.  
463 doi:10.1098/rsos.180041
- 464 34. Dietz C, Nill D, von Helversen O. *Bats of Britain, Europe and Northwest Africa*. A & C  
465 Black; 2009.
- 466 35. Gervasi SS, Civitello DJ, Kilvitis HJ, Martin LB. The context of host competence: a role  
467 for plasticity in host–parasite dynamics. *Trends in Parasitology*. 2015;31: 419–425.  
468 doi:10.1016/j.pt.2015.05.002
- 469 36. Parsons KN, Jones G, Davidson-Watts I, Greenaway F. Swarming of bats at underground  
470 sites in Britain—implications for conservation. *Biological Conservation*. 2003;111: 63–70.  
471 doi:10.1016/S0006-3207(02)00250-1
- 472 37. McCracken GF, Wilkinson GS. Bat Mating Systems. In: Crichton EG, Krutzsch PH,  
473 editors. *Reproductive Biology of Bats*. London: Academic Press; 2000. pp. 321–362.  
474 doi:10.1016/B978-012195670-7/50009-6
- 475 38. Nunn CL, Gittleman JL, Antonovics J. Promiscuity and the Primate Immune System.  
476 *Science*. 2000;290: 1168–1170. doi:10.1126/science.290.5494.1168
- 477 39. Schneeberger K, Czirják GÁ, Voigt CC. Measures of the Constitutive Immune System Are  
478 Linked to Diet and Roosting Habits of Neotropical Bats. *PLOS ONE*. 2013;8: e54023.  
479 doi:10.1371/journal.pone.0054023

- 480 40. Munster VJ, Baas C, Lexmond P, Waldenström J, Wallensten A, Fransson T, et al. Spatial,  
481 Temporal, and Species Variation in Prevalence of Influenza A Viruses in Wild Migratory  
482 Birds. *PLOS Pathogens*. 2007;3: e61. doi:10.1371/journal.ppat.0030061
- 483 41. Towner JS, Pourrut X, Albariño CG, Nkogue CN, Bird BH, Grard G, et al. Marburg Virus  
484 Infection Detected in a Common African Bat. *PLOS ONE*. 2007;2: e764.  
485 doi:10.1371/journal.pone.0000764
- 486 42. Hanson BA, Luttrell MP, Goekjian VH, Niles L, Swayne DE, Senne DA, Stallknecht DE.  
487 Is the occurrence of avian influenza virus in Charadriiformes species and location  
488 dependent?. *Journal of Wildlife Diseases*. 2008 Apr;44(2):351-61.
- 489 43. Greenwood PJ. Mating systems, philopatry and dispersal in birds and mammals. *Animal*  
490 *Behaviour*. 1980;28: 1140–1162. doi:10.1016/S0003-3472(80)80103-5
- 491 44. Klein SL. The effects of hormones on sex differences in infection: from genes to behavior.  
492 *Neuroscience & Biobehavioral Reviews*. 2000;24: 627–638. doi:10.1016/S0149-  
493 7634(00)00027-0
- 494 45. Baker KS, Suu-Ire R, Barr J, Hayman DTS, Broder CC, Horton DL, et al. Viral antibody  
495 dynamics in a chiropteran host. *Journal of Animal Ecology*. 2014; 415–428.  
496 doi:10.1111/1365-2656.12153@10.1111/(ISSN)1365-2656.OAWEEK2014
- 497 46. Gannon WL, Sikes RS. Guidelines of the American Society of Mammalogists for the Use  
498 of Wild Mammals in Research. *J Mammal*. 2007;88: 809–823. doi:10.1644/06-MAMM-F-  
499 185R1.1
- 500 47. Casas I, Avellon A, Mosquera M, Jabado O, Echevarria JE, Campos RH, et al. Molecular  
501 Identification of Adenoviruses in Clinical Samples by Analyzing a Partial Hexon Genomic

- 502           Region. *Journal of Clinical Microbiology*. 2005;43: 6176–6182.
- 503           doi:10.1128/JCM.43.12.6176-6182.2005
- 504   48. Calvo C, García-García ML, Sanchez-Dehesa R, Román C, Tabares A, Pozo F, et al. Eight  
505           Year Prospective Study of Adenoviruses Infections in Hospitalized Children. Comparison  
506           with Other Respiratory Viruses. *PLOS ONE*. 2015;10: e0132162.  
507           doi:10.1371/journal.pone.0132162
- 508   49. Ibáñez C, García-Mudarra JL, Ruedi M, Stadelmann B, Juste J. The Iberian contribution to  
509           cryptic diversity in European bats. *Acta Chiropterologica*. 2006 Dec 19;8(2):277-97.
- 510   50. Kaňuch P, Hájková P, Řehák Z, Bryja J. A rapid PCR-based test for species identification  
511           of two cryptic bats *Pipistrellus pipistrellus* and *P. pygmaeus* and its application on museum  
512           and dropping samples. *Acta Chiropterologica*. 2007 Jun 1;9(1):277-82.
- 513   51. Tsagkogeorga G, Parker J, Stupka E, Cotton JA, Rossiter SJ. Phylogenomic Analyses  
514           Elucidate the Evolutionary Relationships of Bats. *Current Biology*. 2013;23: 2262–2267.  
515           doi:10.1016/j.cub.2013.09.014
- 516   52. Guillén-Servent A, Francis CM, Ricklefs RE. Phylogeny and biogeography of the  
517           horseshoe bats. *Horseshoe bats of the world* Exeter: Pelagic Publishing Ltd. 2003;
- 518   53. Ruedi M, Stadelmann B, Gager Y, Douzery EJP, Francis CM, Lin L-K, et al. Molecular  
519           phylogenetic reconstructions identify East Asia as the cradle for the evolution of the  
520           cosmopolitan genus *Myotis* (Mammalia, Chiroptera). *Molecular Phylogenetics and*  
521           *Evolution*. 2013;69: 437–449. doi:10.1016/j.ympev.2013.08.011
- 522   54. Stadelmann B, Jacobs DS, Schoeman C, Ruedi M. Phylogeny of African *Myotis* bats  
523           (Chiroptera, Vespertilionidae) inferred from cytochrome b sequences. *Acta*  
524           *Chiropterologica*. 2004 Sep 1;6(2):177-92.



- 525 55. Hooper SR, Bussche RA. *Molecular Phylogenetics of the Chiropteran Family*  
526 *Vespertilionidae*. *acta*. 2003;5: 1–63. doi:10.3161/001.005.s101
- 527 56. Glez-Peña D, Gómez-Blanco D, Reboiro-Jato M, Fdez-Riverola F, Posada D. ALTER:  
528 program-oriented conversion of DNA and protein alignments. *Nucleic Acids Res*. 2010;38:  
529 W14–W18. doi:10.1093/nar/gkq321
- 530 57. Tamura K, Dudley J, Nei M, Kumar S. MEGA4: Molecular Evolutionary Genetics  
531 Analysis (MEGA) Software Version 4.0. *Mol Biol Evol*. 2007;24: 1596–1599.  
532 doi:10.1093/molbev/msm092
- 533 58. Lanfear R, Calcott B, Ho SYW, Guindon S. PartitionFinder: Combined Selection of  
534 Partitioning Schemes and Substitution Models for Phylogenetic Analyses. *Mol Biol Evol*.  
535 2012;29: 1695–1701. doi:10.1093/molbev/mss020
- 536 59. Drummond AJ, Rambaut A. BEAST: Bayesian evolutionary analysis by sampling trees.  
537 *BMC Evolutionary Biology*. 2007;7: 214. doi:10.1186/1471-2148-7-214
- 538 60. Rambaut A, Drummond AJ, Xie D, Baele G, Suchard MA. Posterior Summarization in  
539 Bayesian Phylogenetics Using Tracer 1.7. *Syst Biol*. 2018;67: 901–904.  
540 doi:10.1093/sysbio/syy032
- 541 61. Fritz SA, Purvis A. Selectivity in Mammalian Extinction Risk and Threat Types: a New  
542 Measure of Phylogenetic Signal Strength in Binary Traits. *Conservation Biology*. 2010;24:  
543 1042–1051. doi:10.1111/j.1523-1739.2010.01455.x
- 544 62. Pagel M. Inferring the historical patterns of biological evolution. *Nature*. 1999;401: 877.  
545 doi:10.1038/44766

- 546 63. Blomberg SP, Garland T, Ives AR. Testing for Phylogenetic Signal in Comparative Data:  
547 Behavioral Traits Are More Labile. *Evolution*. 2003;57: 717–745. doi:10.1111/j.0014-  
548 3820.2003.tb00285.x
- 549 64. MARCHAIS G, THAURONT M. Action Plan for the Conservation of All Bat Species in  
550 the European Union 2018 - 2024. 2018.
- 551 65. R Development Core Team R. R: A language and environment for statistical computing. R  
552 foundation for statistical computing Vienna, Austria; 2011.
- 553 66. Orme D, Freckleton R, Thomas G, Petzoldt T. The caper package: comparative analysis of  
554 phylogenetics and evolution in R. R package version. 2013;5: 1–36.
- 555 67. Revell LJ. phytools: an R package for phylogenetic comparative biology (and other things).  
556 *Methods in Ecology and Evolution*. 2012;3: 217–223. doi:10.1111/j.2041-  
557 210X.2011.00169.x@10.1111/(ISSN)2041-210X.TOPMETHODS
- 558 68. Tung Ho L si, Ané C. A Linear-Time Algorithm for Gaussian and Non-Gaussian Trait  
559 Evolution Models. *Syst Biol*. 2014;63: 397–408. doi:10.1093/sysbio/syu005
- 560 69. Symonds MRE, Blomberg SP. A Primer on Phylogenetic Generalised Least Squares.  
561 *Modern Phylogenetic Comparative Methods and Their Application in Evolutionary*  
562 *Biology*. 2014; 105–130. doi:10.1007/978-3-662-43550-2\_5
- 563 70. Butler MA, King AA. Phylogenetic Comparative Analysis: A Modeling Approach for  
564 Adaptive Evolution. *The American Naturalist*. 2004;164: 683–695. doi:10.1086/426002
- 565 71. Akaike H. A New Look at the Statistical Model Identification. *Selected Papers of Hirotugu*  
566 *Akaike*. 1974; 215–222. doi:10.1007/978-1-4612-1694-0\_16

- 567 72. Burnham KP, Anderson DR. Multimodel Inference: Understanding AIC and BIC in Model  
568 Selection. *Sociological Methods & Research*. 2004;33: 261–304.  
569 doi:10.1177/0049124104268644
- 570 73. Paradis E, Claude J, Strimmer K. APE: Analyses of Phylogenetics and Evolution in R  
571 language. *Bioinformatics*. 2004;20: 289–290. doi:10.1093/bioinformatics/btg412
- 572 74. Bates D, Sarkar D, Bates MD, Matrix L. The lme4 package. *R package version*. 2007;2: 74.
- 573 75. Barton K. MuMIn : multi-model inference. <http://r-forge.r-project.org/projects/mumin/>.  
574 2009; Available: <https://ci.nii.ac.jp/naid/20001420752>
- 575 76. Mantel N. The Detection of Disease Clustering and a Generalized Regression Approach.  
576 *Cancer Res*. 1967;27: 209–220.
- 577 77. Dray S, Dufour A-B. The ade4 package: implementing the duality diagram for ecologists.  
578 *Journal of statistical software*. 2007;22: 1–20.

579

580

581 **Figure captions**

582

583 **Fig 1. Study sites in Spain where bats were screened for AdVs.** Blue dots indicate localities  
584 with at least one AdVs positive samples, orange dots indicate localities with negative samples for  
585 AdVs. (Modified from HansenBCN Miguillen - Own work, Public Domain,  
586 <https://commons.wikimedia.org/w/index.php?curid=10577766>)

587 **Fig 2. Boxplot of the percentage of positive individuals for species engaging in swarming**  
588 **and species not engaging in swarming.** 0 indicates species not using swarming as mating  
589 strategy, 1 indicates species using swarming as mating strategy. ( $N= 160$ ).

590 **Fig 3. Results of within-species analysis.** (A) Barplot by sex of number of individuals positive  
591 (blue) and negative (red) to Adenovirus, for *Nyctalus lasiopterus*. (B) Boxplot for individuals  
592 screening negative for AdVs (0) and positive for AdVs (1) in relation to forearm length for  
593 *Pipistrellus kuhlii*.

594 **Fig 4. Sampling localities with percentage of AdVs positive samples.** Portion of AdVs  
595 positive sample is indicated in blue, AdVs negative samples in orange for (A) *Nyctalus*  
596 *lasiopterus*, (B) *Pipistrellus pygmaeus* (C) *Pipistrellus kuhlii*. Only localities with at least 5  
597 recorded individuals are shown. (Modified from HansenBCN Miguillen - Own work, Public  
598 Domain, <https://commons.wikimedia.org/w/index.php?curid=10577766>)

599

600 **Supporting information**

601 **S1 Table. Result of the percentage models.** Models under Brownian motion, Pagel and  
602 Ornstein-Uhlenbeck structures.

603 **S2 Table. Results of absence/presence model.** Estimate value, standard error, Z-score and p-  
604 value included.

605 **S3 Table. Result of GLMM model (individual level) for each species taken into account.** A:  
606 *Nyctalus lasiopterus*. B: *Pipistrellus pygmaeus*. C: *Pipistrellus kuhlii*.

607 **S4 Table. Traits used in the model for each species.** Information taken from: 1: Dietz *et*  
608 *al.*[34], 2: Action Plan for the Conservation of All Bat Species in the European Union [64].  
609 Values indicated with asterisk have been obtained by personal communication of Jens Rydell  
610 and Jesús Nogueras Montiel.

611 **S1 Fig. Evolutionary relationships of bat species considered in this study.** Based on the  
612 phylogenetic hypotheses of: Guillén-Servent *et al* [52].; Hooper and Bussche [55]; Ruedi *et al.* [53]  
613 and Stadelmann *et al.* [54]. Branch lengths reflect mitochondrial sequence divergences. Tip  
614 labels indicate species screening positive (black) or negative (white) for AdVs.

615 **S2 Figure. Scatterplot showing the results of the Mantel test.** Mantel test between the matrix  
616 of differences in percentages of AdVs presence and the matrix of geographic distances for (A)  
617 *Nyctalus lasiopterus* (B) *Pipistrellus pygmaeus* and (C) *P. kuhlii*.

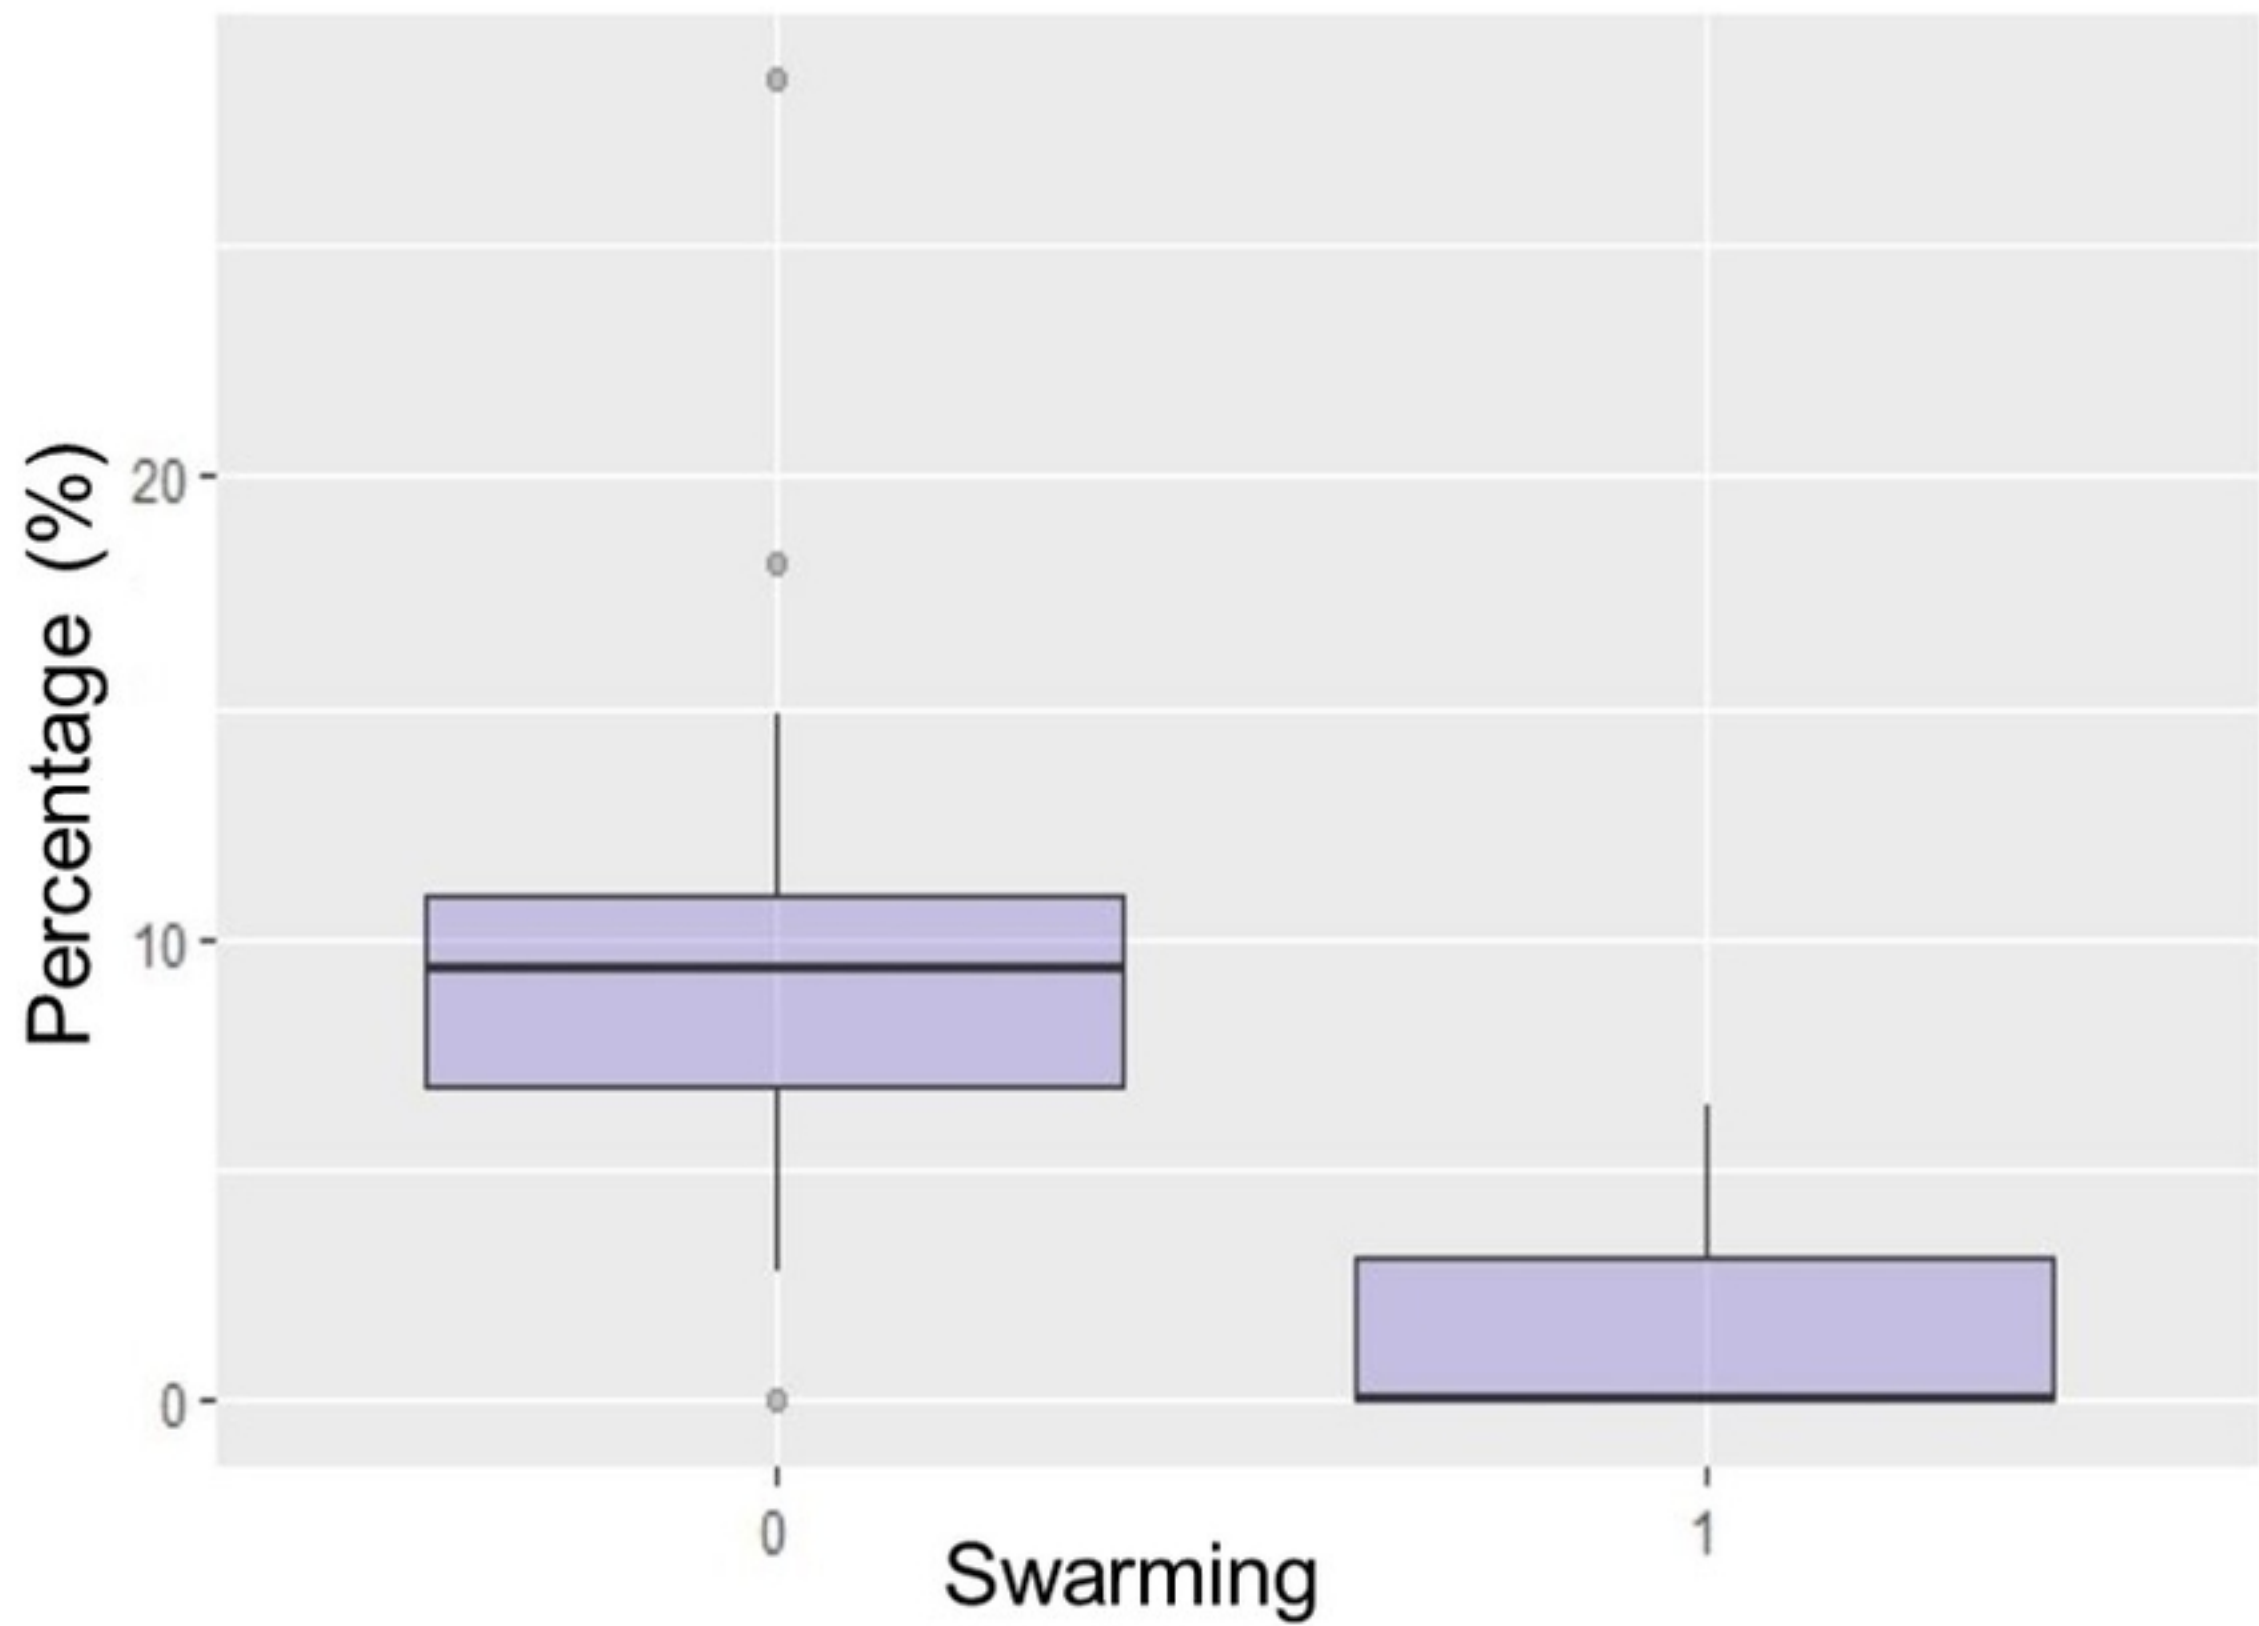

Figure

# *Nyctalus lasiopterus*

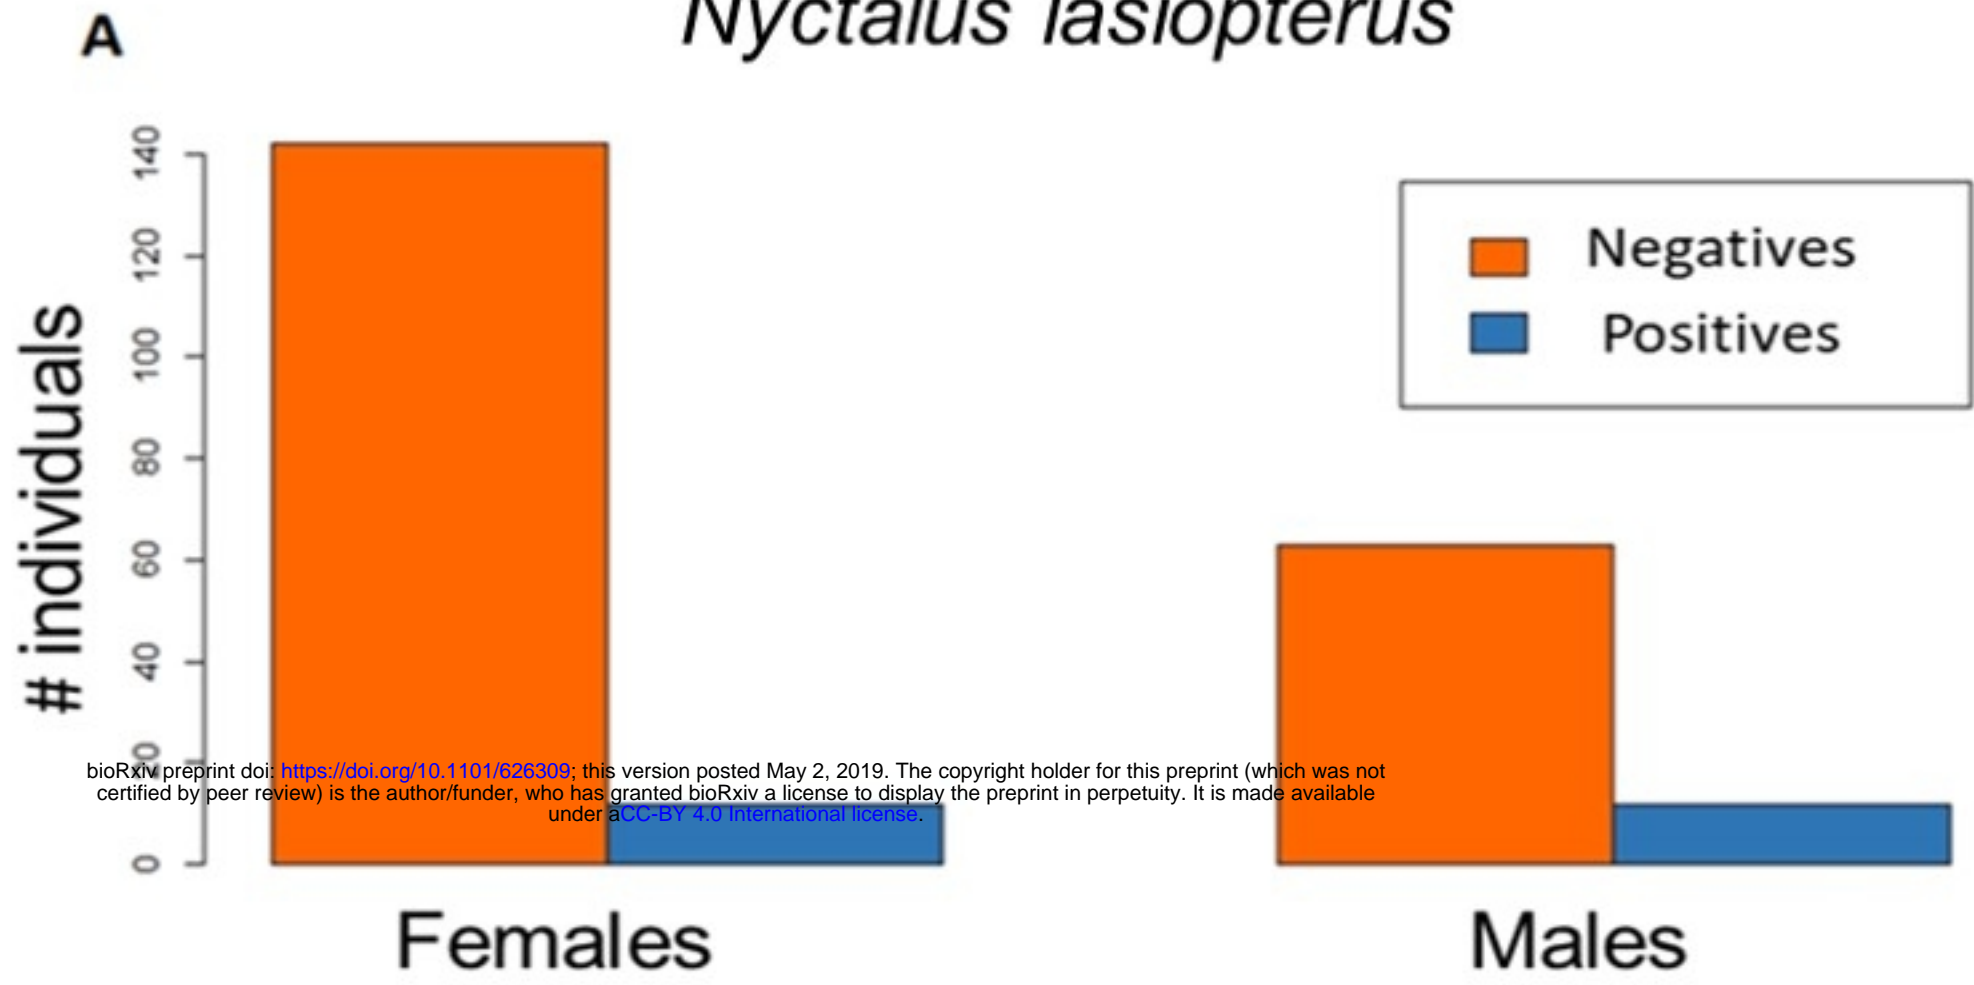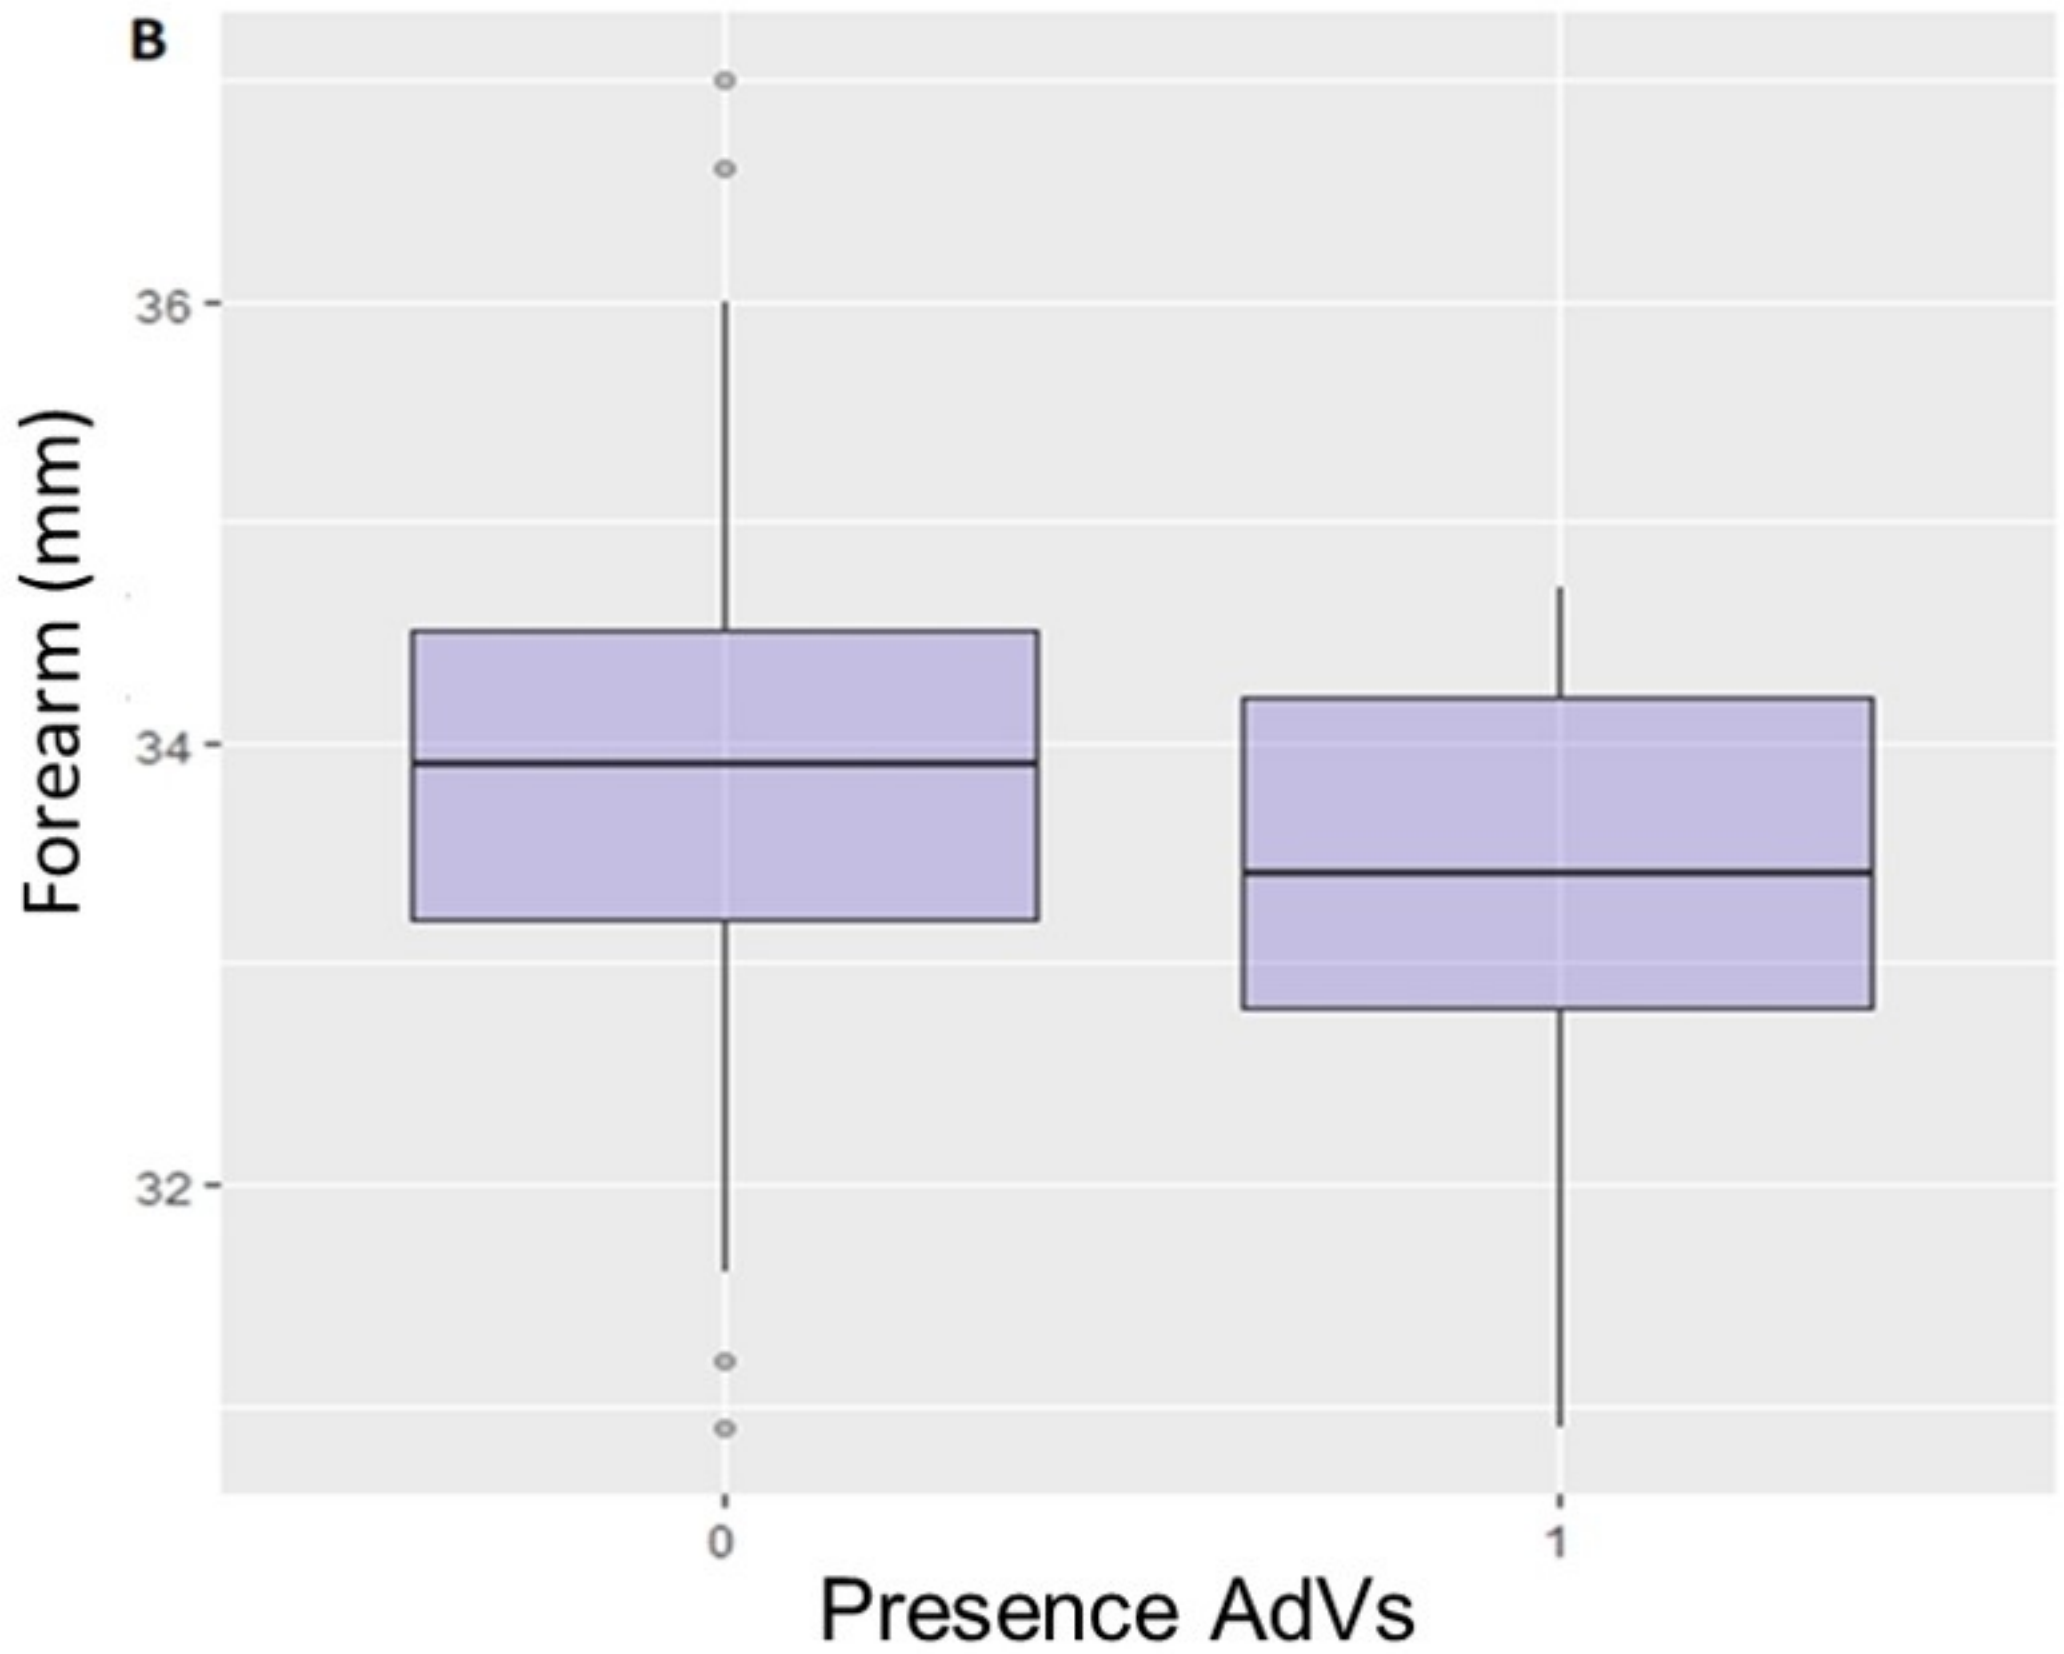

Figure

|    | Locality    |
|----|-------------|
| 1  | Cádiz       |
| 2  | Seville     |
| 3  | Huelva      |
| 4  | Córdoba     |
| 5  | Málaga      |
| 6  | Ciudad Real |
| 7  | Toledo      |
| 8  | Cáceres     |
| 9  | Segovia     |
| 10 | Guadalajara |
| 11 | Madrid      |
| 12 | A Coruña    |
| 13 | Lugo        |
| 14 | Biscay      |
| 15 | La Rioja    |
| 16 | Navarra     |
| 17 | Gerona      |
| 18 | Castellón   |
| 19 | Valencia    |
| 20 | Alicante    |
| 21 | Menorca     |

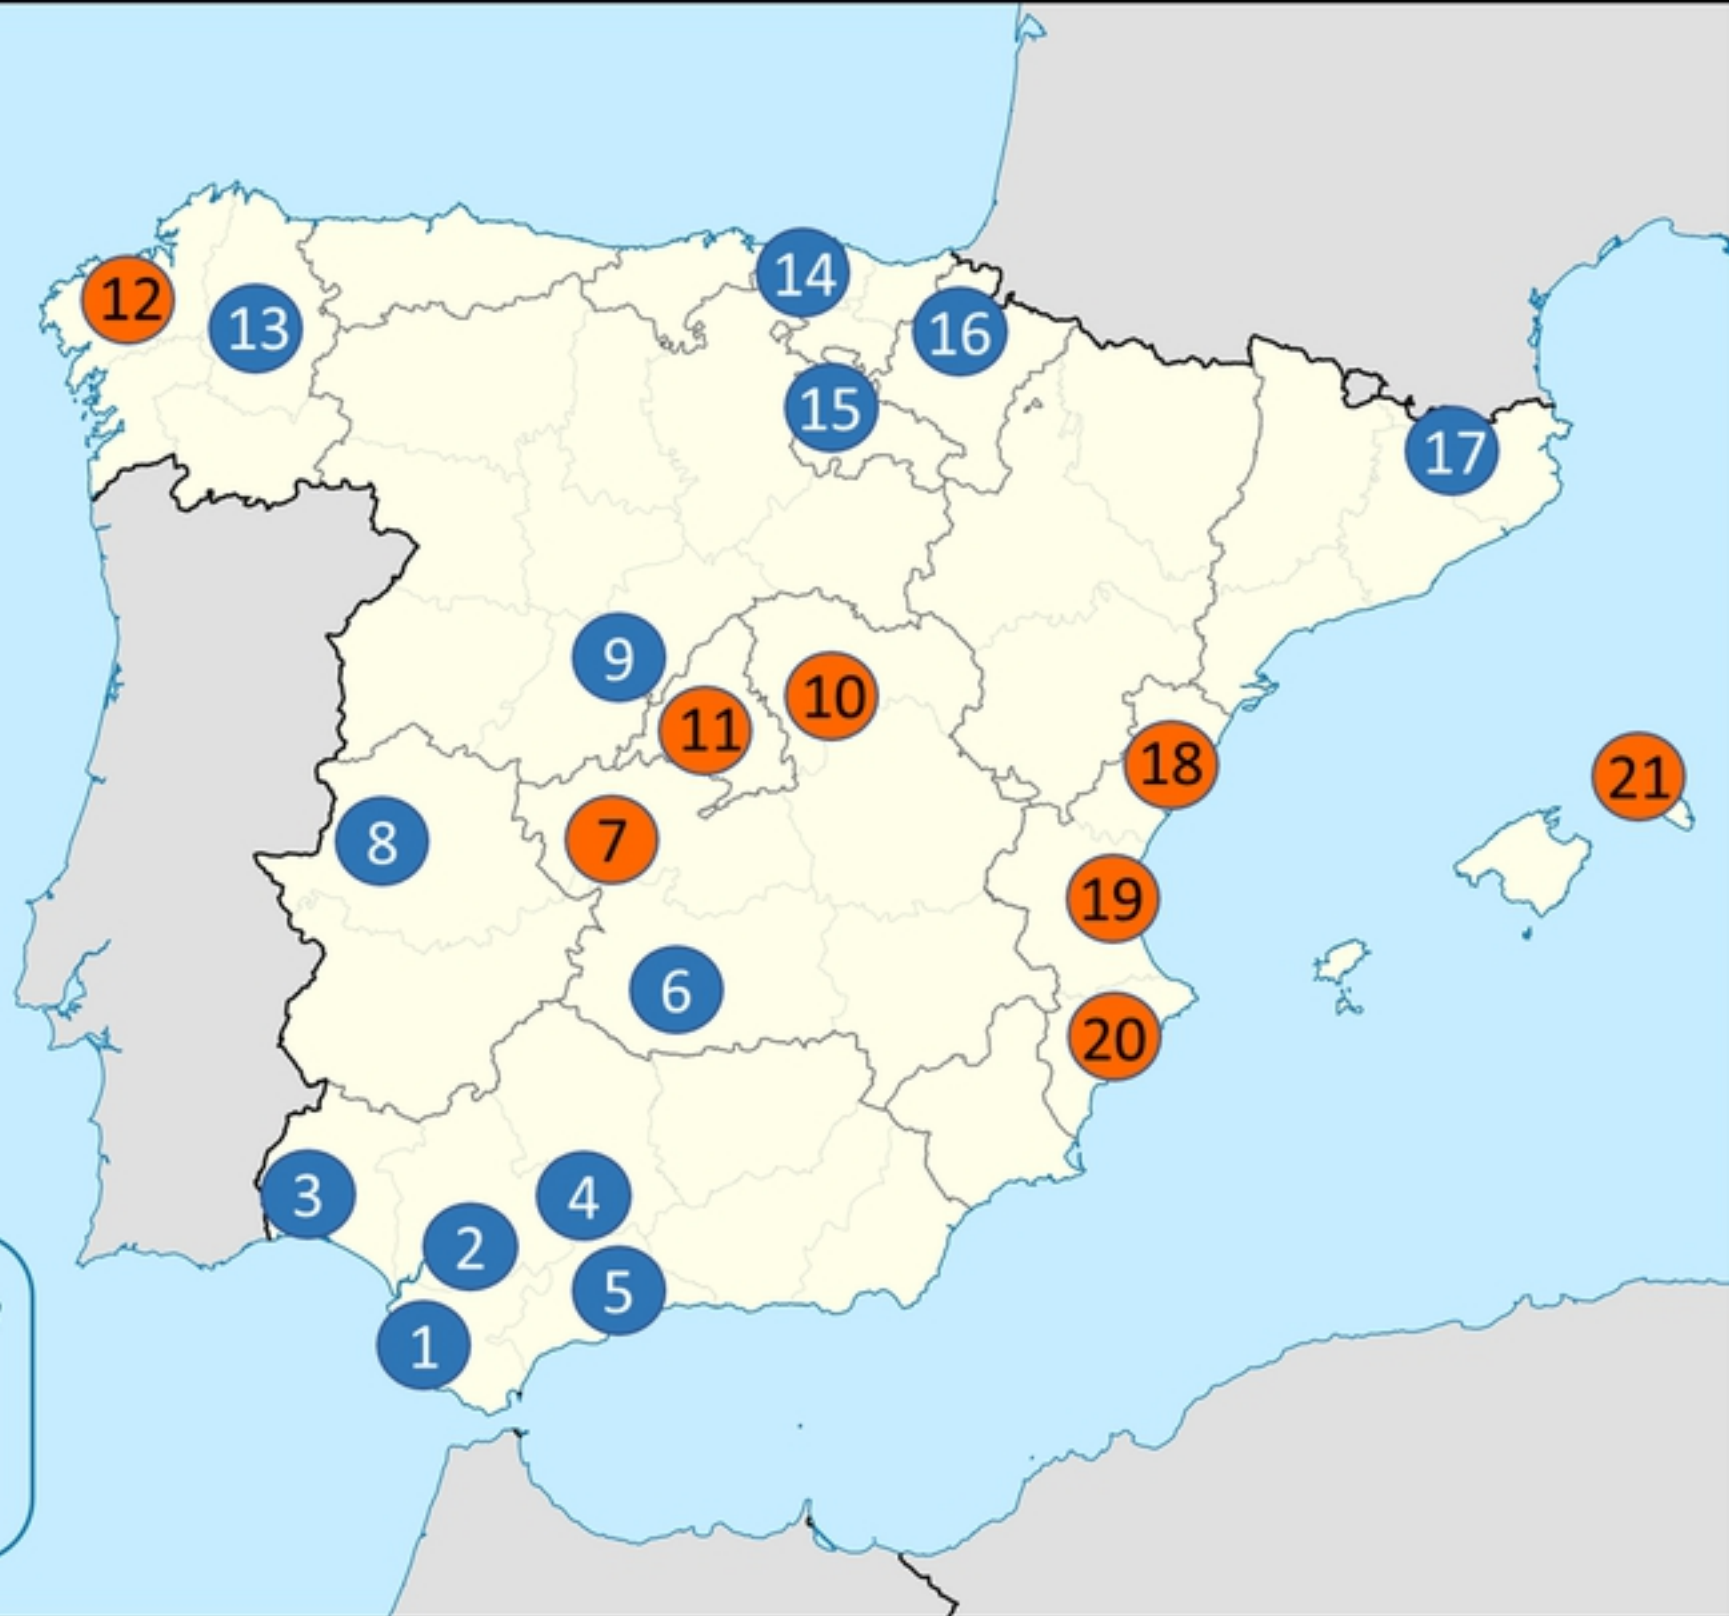

Figure



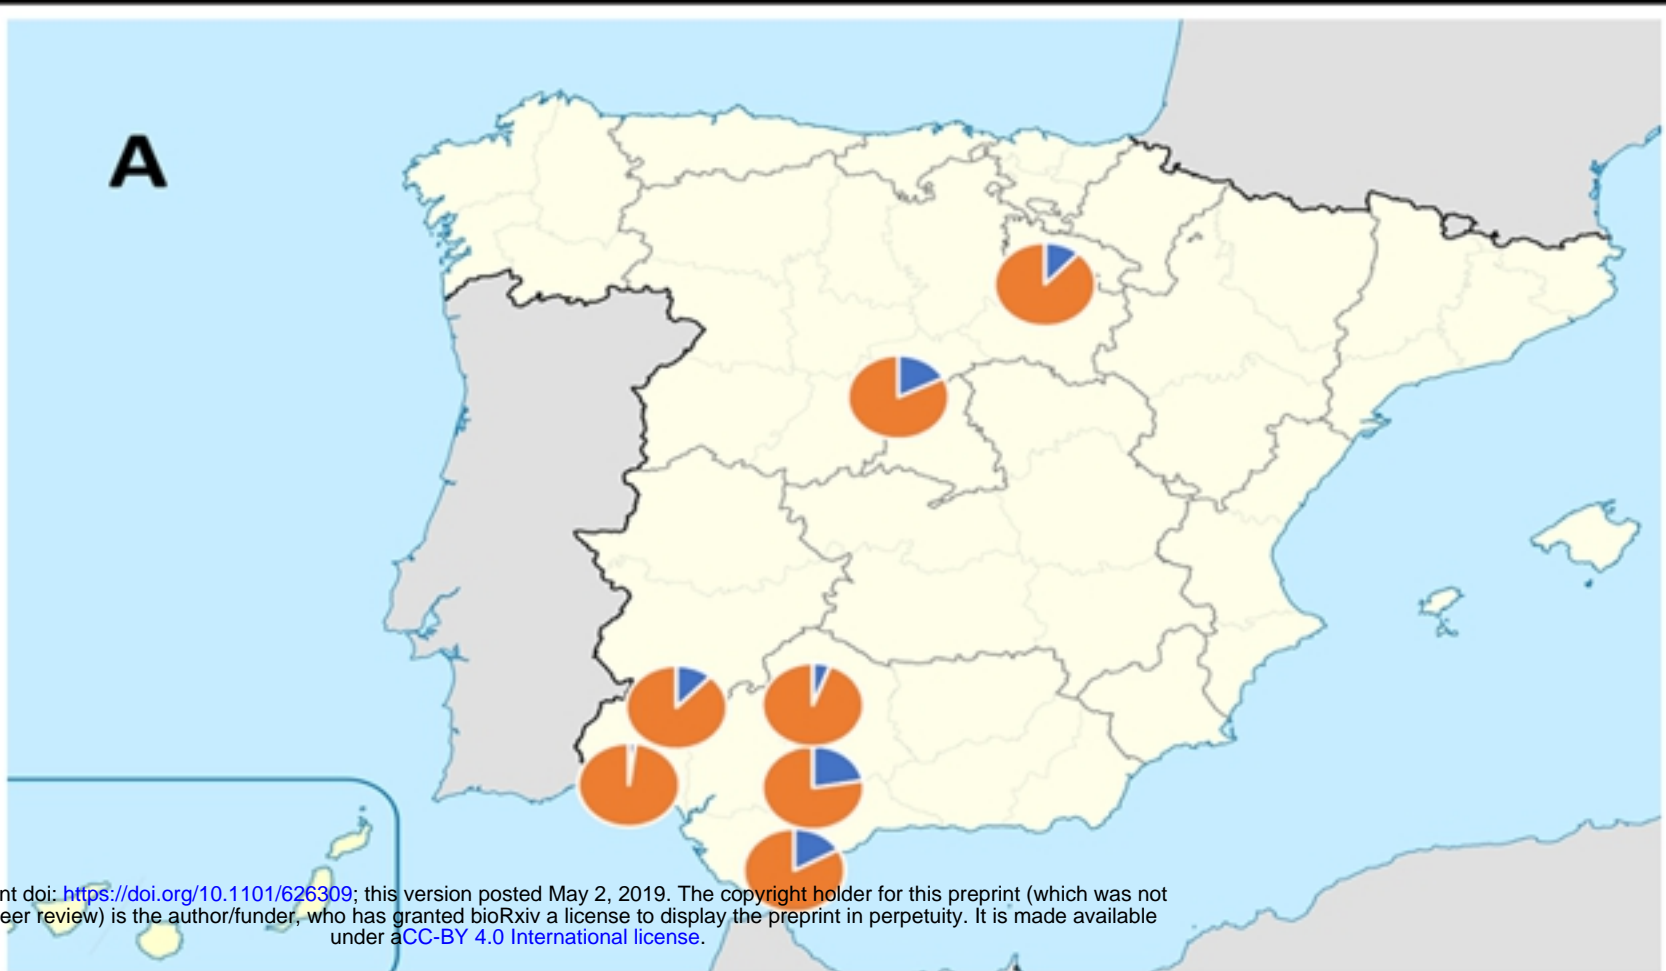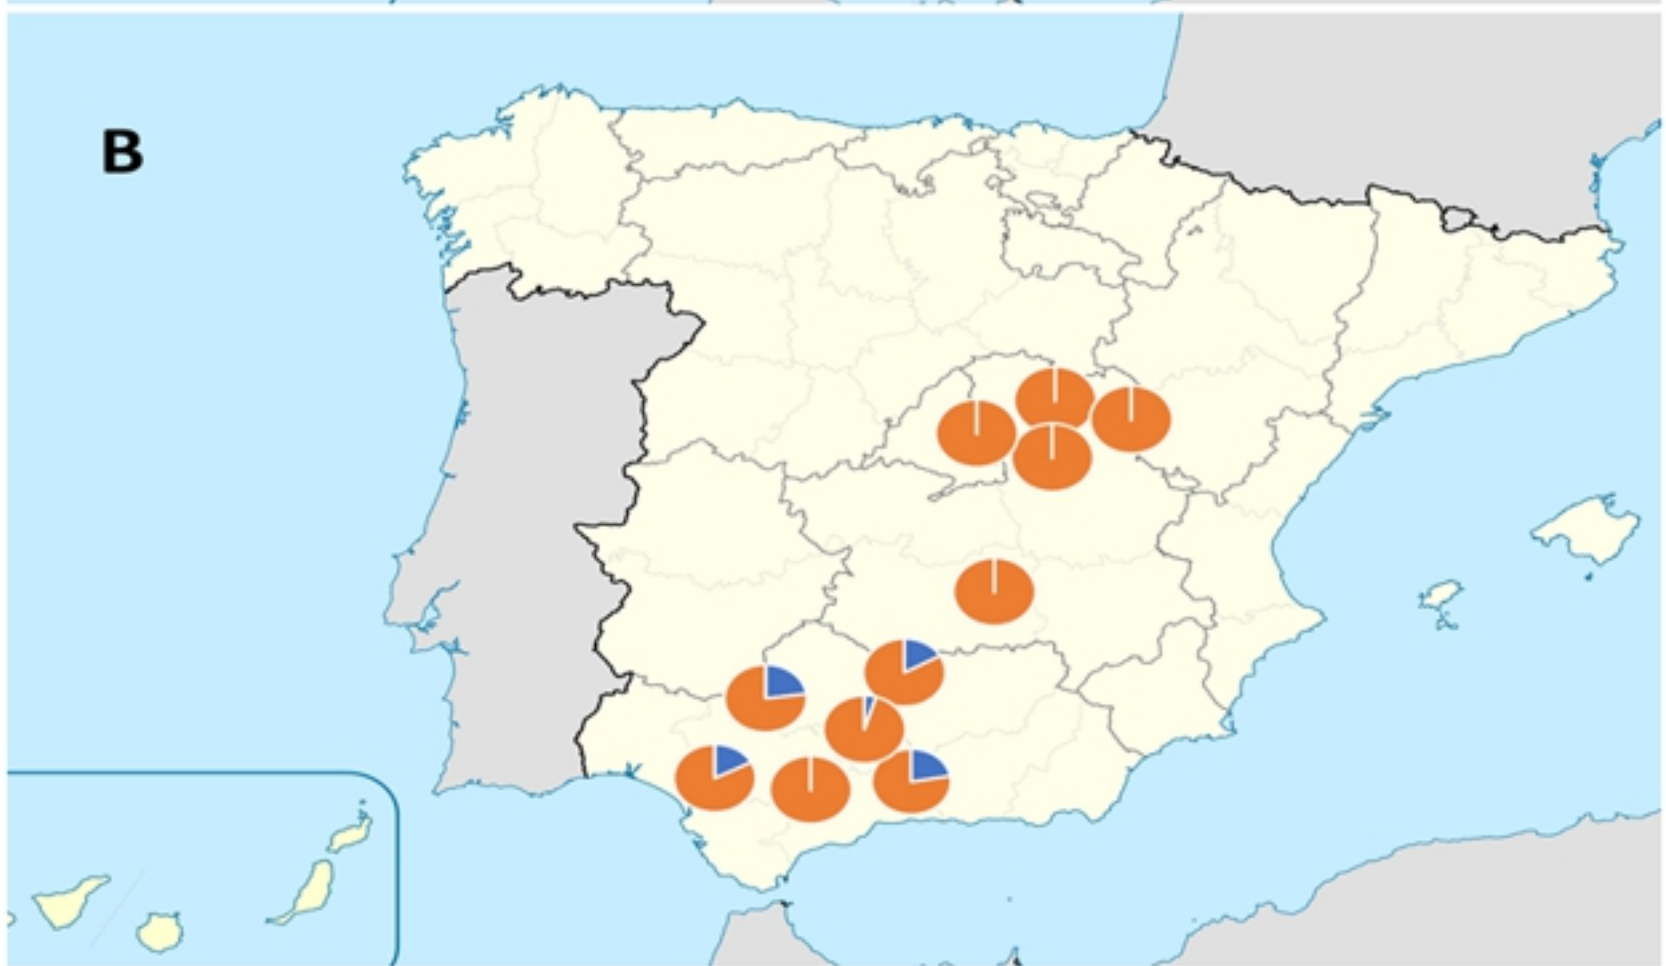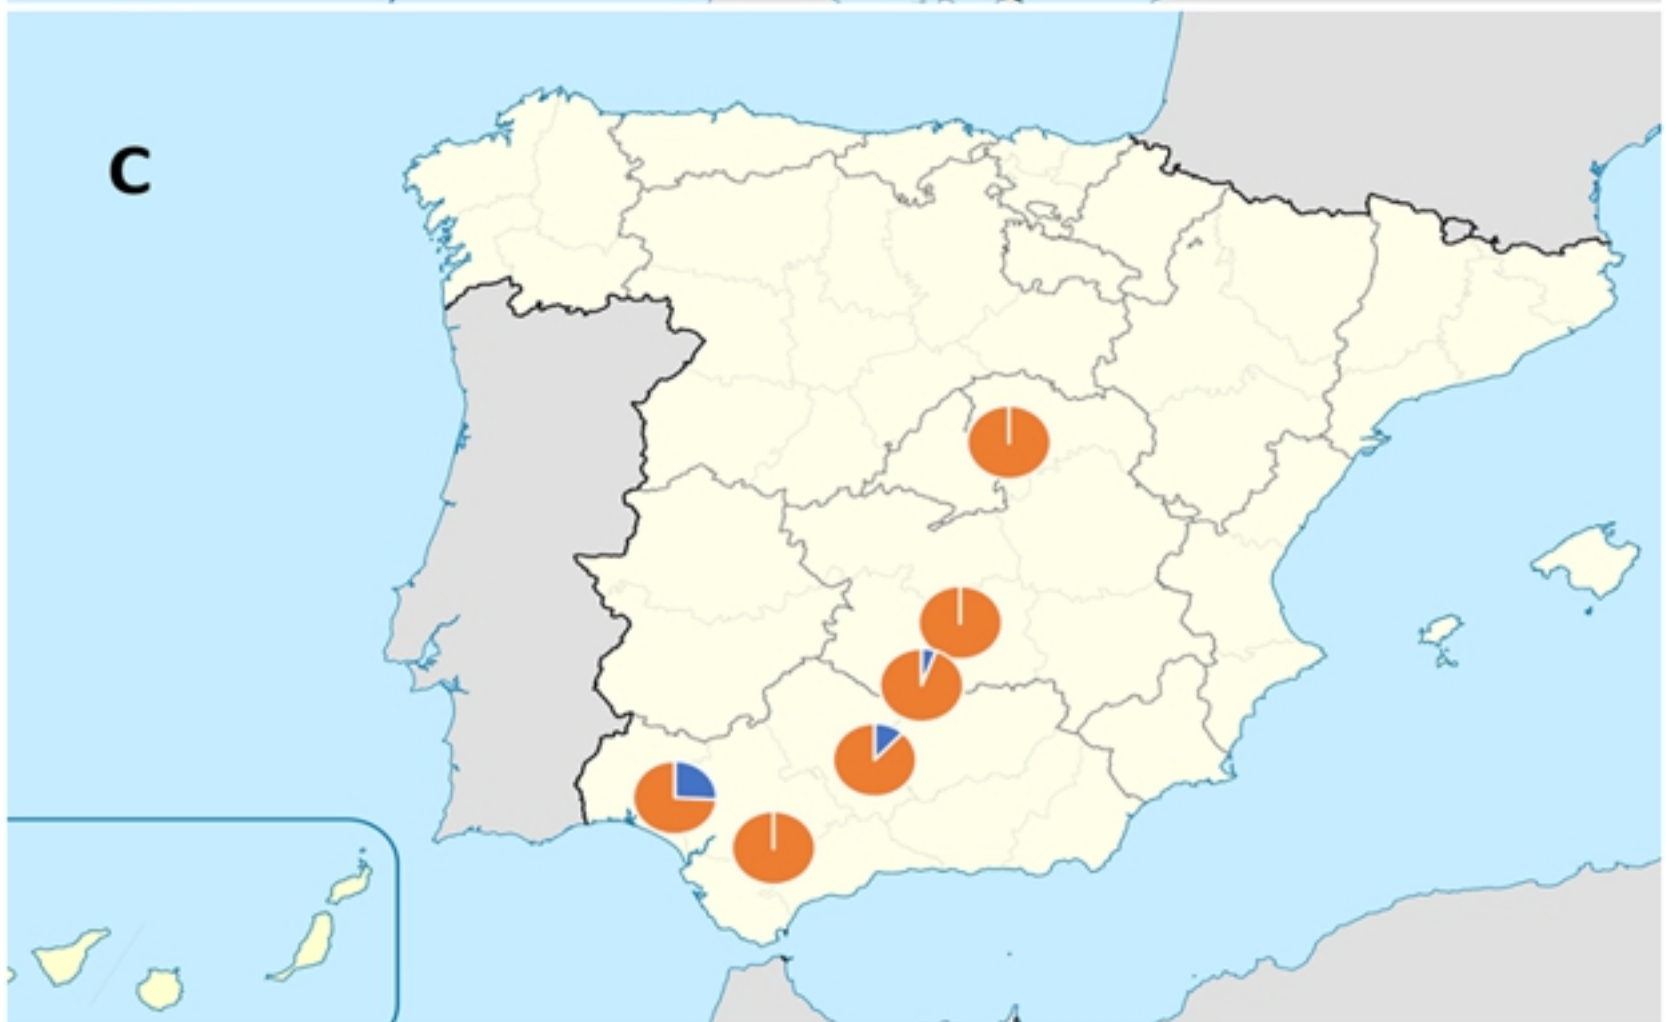

Figure
